# Supplementary material
Source: PubMed Central journal article supplement (PMC4274423)

**Supplemental Figure S1.** Validation of the TMT-based quantitative community proteomics method. Histograms of log<sub>2</sub>-scale protein abundance ratios measured in the three standard mixtures (from AMD biofilm peptides) with estimated mixing ratios of 1.6:1 (red), 2.8:1 (blue), and 8.3:1 (green). The mixing ratios were estimated from the total intensities between TMT126 and TMT127.

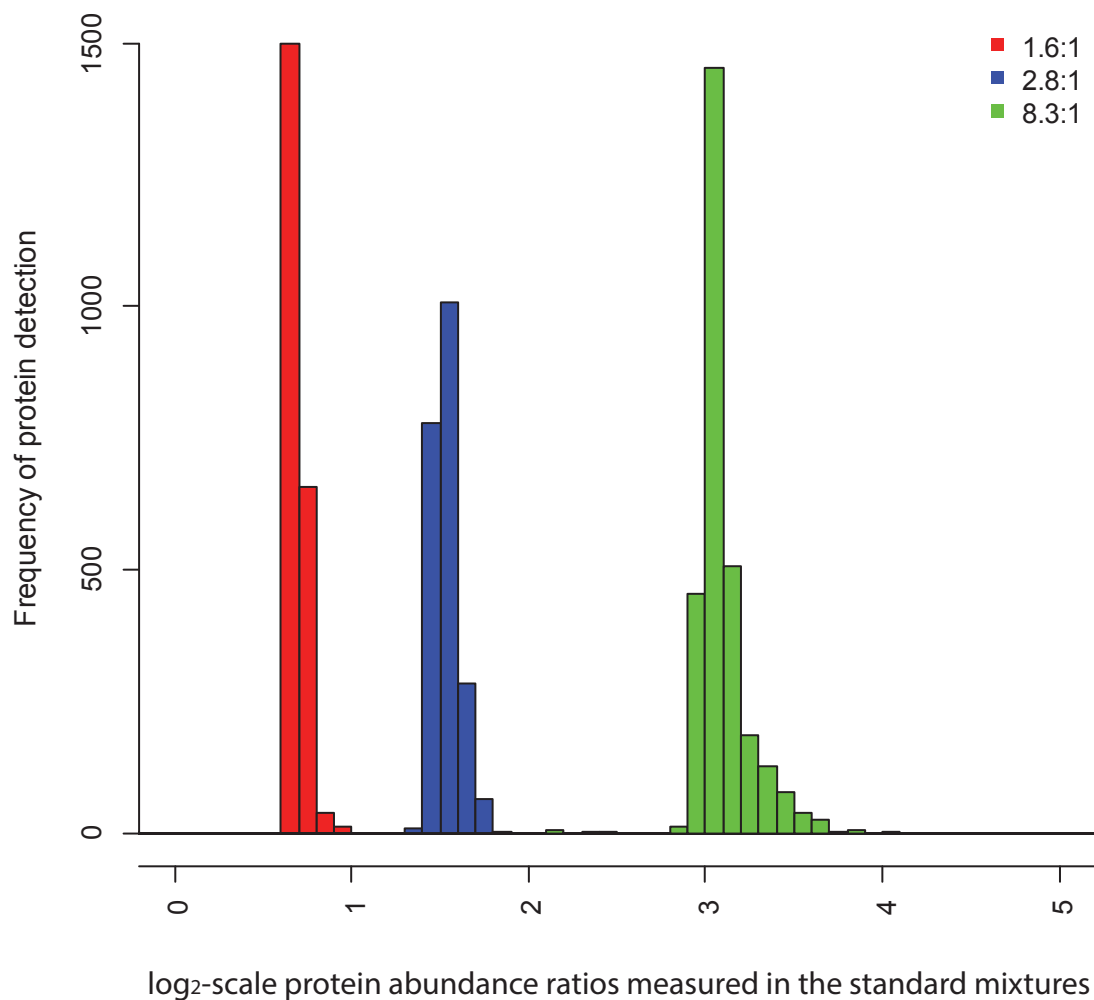

Supplement: ismej2014113x1.pdf [file ismej2014113x1.pdf]
