# Supplementary material
Source: PubMed Central journal article supplement (PMC4274423)

**Supplemental Figure S2.** Temperatures of the acid mine drainage solution at the AB-muck site in the Richmond Mine during periods of biofilm accumulation.

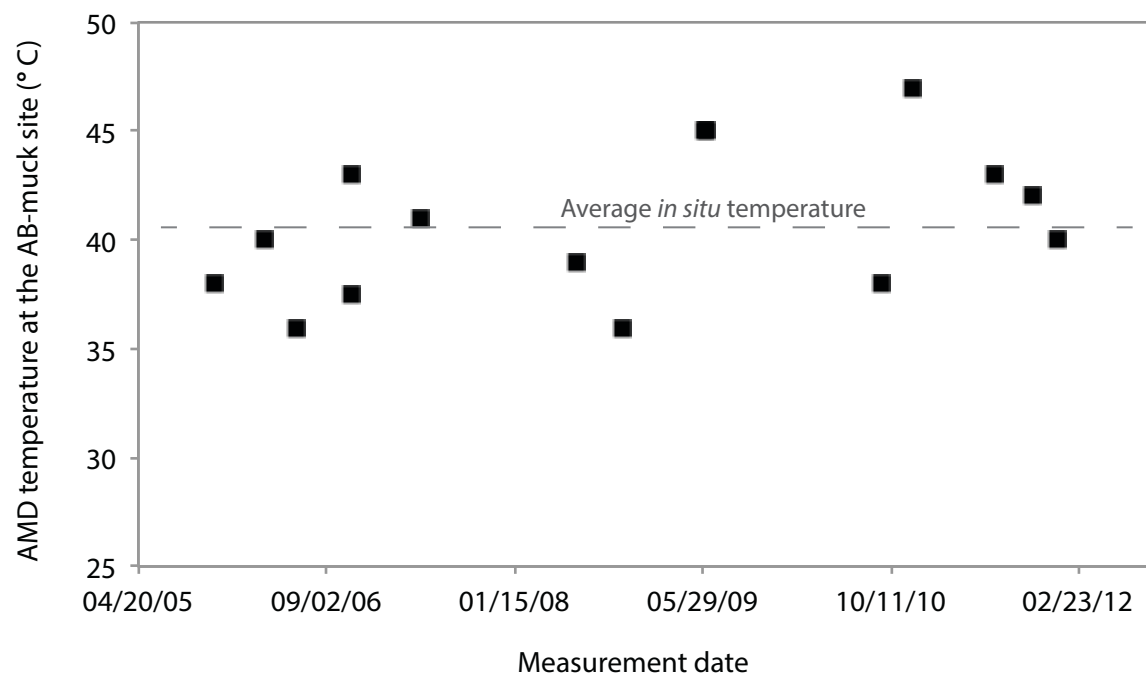

Supplement: ismej2014113x2.pdf [file ismej2014113x2.pdf]
