# Supplementary material
Source: PubMed Central journal article supplement (PMC4274423)

**Supplemental Figure S3.** Community composition of natural and cultivated AMD communities based on A) fluorescence *in situ* hybridization and B) protein abundance as measured by TMT-proteomics.

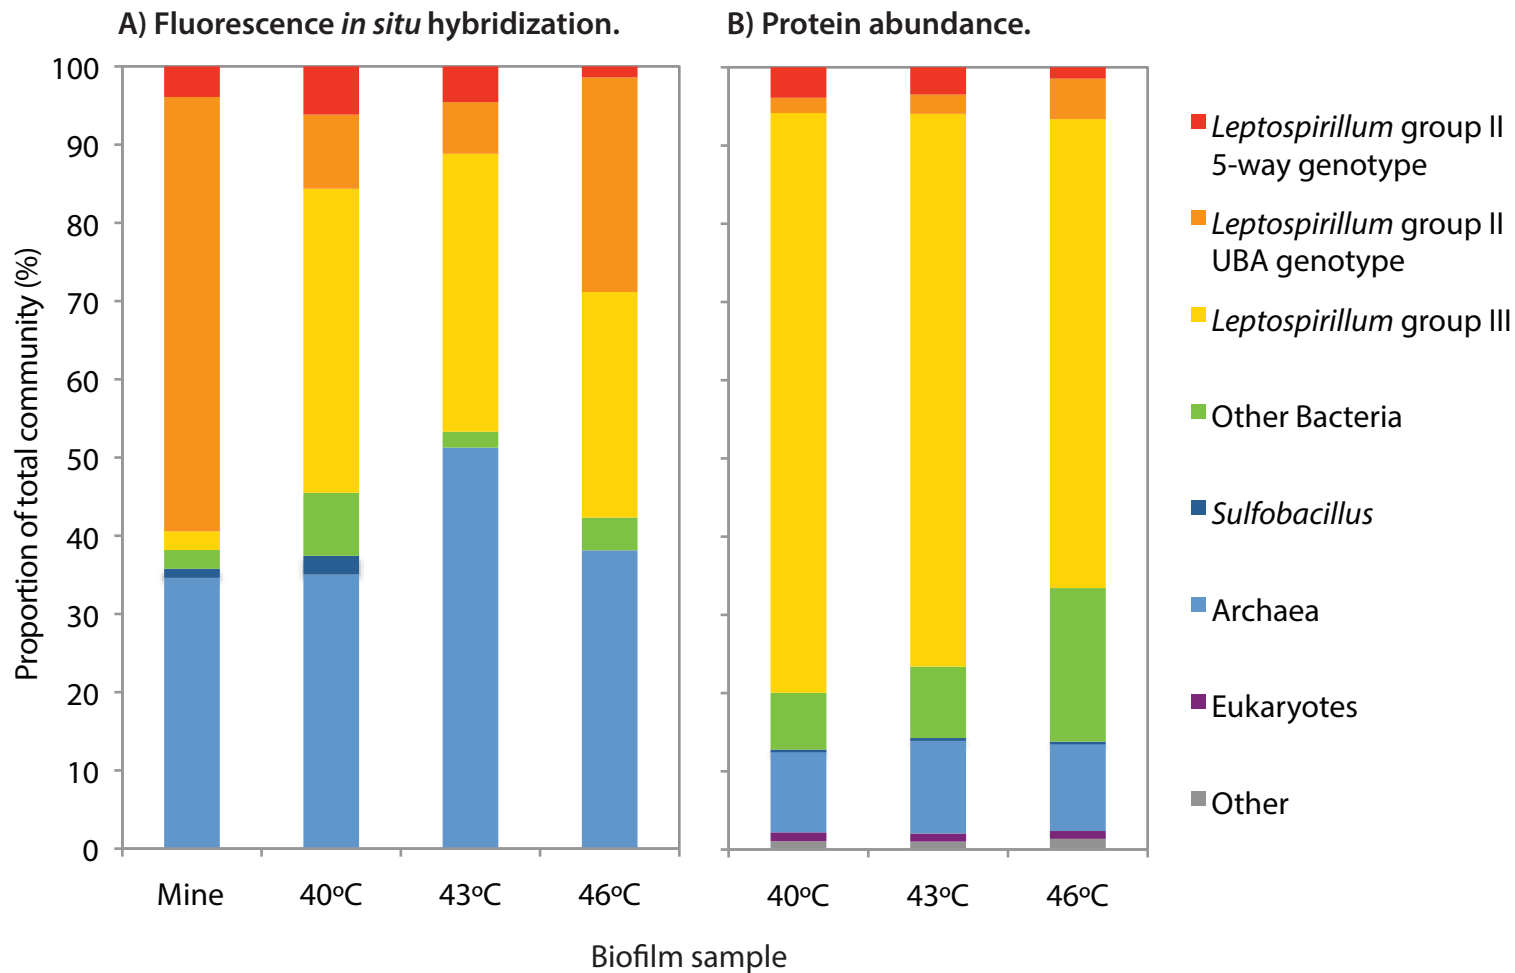

Supplement: ismej2014113x3.pdf [file ismej2014113x3.pdf]
