# Supplementary material
Source: PubMed Central journal article supplement (PMC4274423)

**Supplemental Figure S4.** Abundance of G-plasma carbon cycling proteins (predicted by Yelton et al., 2013) at 40°C and 46°C. Stars indicate proteins that are significantly different at a given temperature (fold-change >1.2 or <0.8; one star  $p \leq 0.1$ ; two stars  $p \leq 0.05$ ).

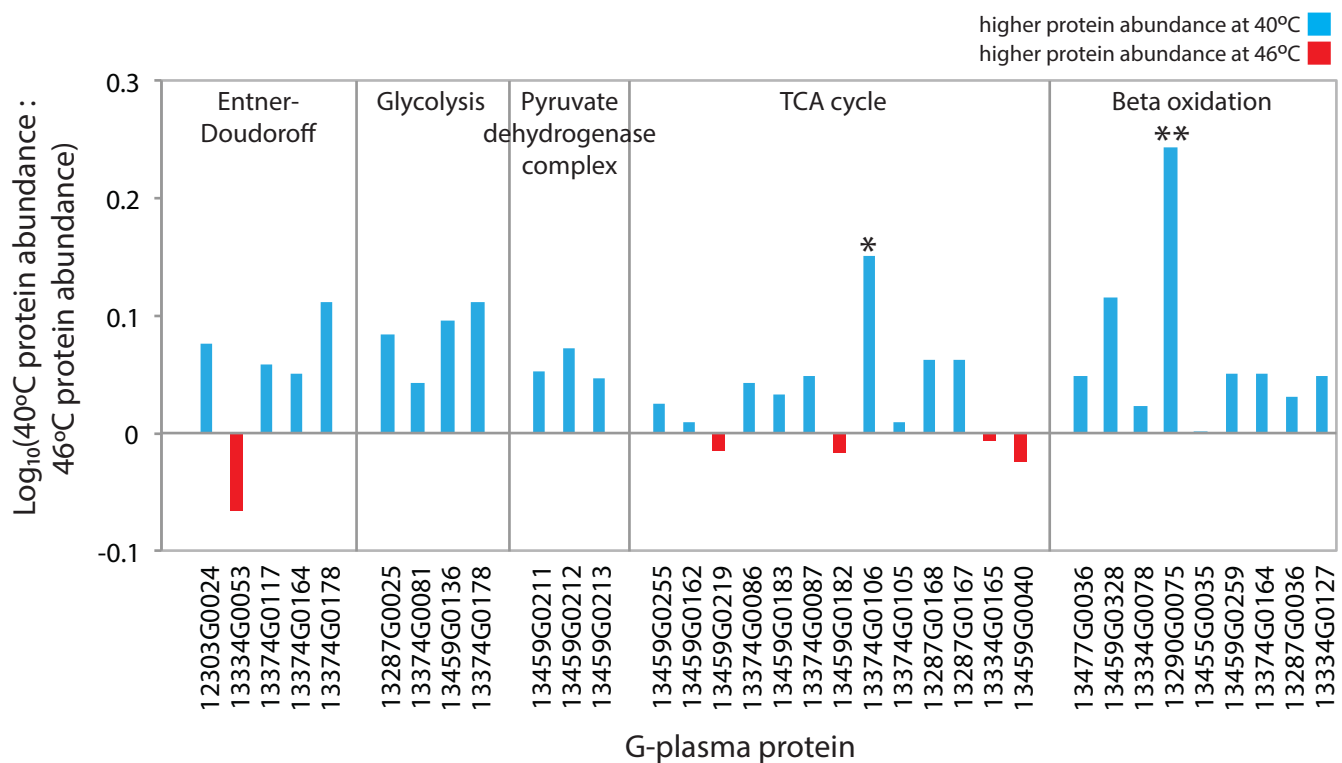

Supplement: ismej2014113x4.pdf [file ismej2014113x4.pdf]
