# Supplementary material
Source: PubMed Central journal article supplement (PMC4274423)
Supplement: ismej2014113x5.pdf [file ismej2014113x5.pdf]

**Supplemental Table S1.** Protein abundance normalized at the community-level (reporter ion intensities summed from unique peptides).

| <b>Locus ID</b>    | <b>40C</b> | <b>43C</b> | <b>46C</b> |
|--------------------|------------|------------|------------|
| AILUNK_106728G0015 | 3.85E+06   | 3.93E+06   | 3.03E+06   |
| AILUNK_134007G0007 | 7.35E+05   | 6.68E+05   | 6.31E+05   |
| AILUNK_138887G0001 | 3.59E+03   | 3.37E+03   | 2.63E+03   |
| AILUNK_15384G0001  | 2.57E+05   | 2.75E+05   | 2.34E+05   |
| AILUNK_172694G0014 | 3.20E+06   | 3.87E+06   | 1.88E+06   |
| AILUNK_202035G0002 | 1.41E+06   | 1.92E+06   | 2.28E+06   |
| AILUNK_236846G0007 | 1.99E+05   | 1.75E+05   | 1.58E+05   |
| AILUNK_253412G0042 | 4.50E+07   | 3.37E+07   | 2.94E+07   |
| AILUNK_272224G0004 | 5.89E+06   | 8.54E+06   | 1.17E+07   |
| AILUNK_280143G0001 | 2.95E+05   | 3.87E+05   | 2.93E+05   |
| AILUNK_28806G0002  | 6.24E+05   | 6.88E+05   | 5.28E+05   |
| AILUNK_295017G0001 | 1.13E+07   | 1.00E+07   | 5.18E+06   |
| AILUNK_335370G0003 | 6.25E+05   | 6.91E+05   | 7.89E+05   |
| AILUNK_362581G0004 | 1.82E+06   | 1.83E+06   | 1.91E+06   |
| AILUNK_374355G0025 | 4.78E+05   | 4.35E+05   | 3.07E+05   |
| AILUNK_377897G0002 | 7.33E+05   | 6.50E+05   | 4.28E+05   |
| AILUNK_382656G0003 | 2.60E+07   | 1.53E+07   | 1.41E+07   |
| AILUNK_387090G0004 | 1.85E+05   | 1.66E+05   | 1.80E+05   |
| AILUNK_39059G0005  | 6.11E+07   | 4.66E+07   | 2.99E+07   |
| AILUNK_456098G0037 | 3.89E+05   | 4.02E+05   | 4.24E+05   |
| AILUNK_456098G0077 | 8.86E+06   | 8.52E+06   | 8.69E+06   |
| AILUNK_463667G0009 | 1.61E+08   | 1.73E+08   | 2.95E+08   |
| AILUNK_501179G0020 | 3.35E+06   | 5.01E+06   | 8.05E+06   |
| AILUNK_502548G0115 | 1.12E+07   | 1.05E+07   | 8.64E+06   |
| AILUNK_50367G0002  | 8.81E+06   | 9.10E+06   | 1.17E+07   |
| AILUNK_50367G0005  | 6.62E+06   | 6.98E+06   | 8.82E+06   |
| AILUNK_559076G0003 | 4.75E+03   | 4.48E+03   | 4.46E+03   |
| AILUNK_587103G0024 | 6.67E+04   | 9.15E+04   | 0.00E+00   |
| AILUNK_639898G0017 | 1.77E+06   | 1.56E+06   | 1.81E+06   |
| AILUNK_642625G0022 | 3.85E+05   | 3.76E+05   | 6.12E+05   |
| AILUNK_642625G0028 | 1.41E+08   | 1.31E+08   | 1.79E+08   |
| AILUNK_65780G0003  | 1.41E+06   | 1.92E+06   | 2.28E+06   |
| AILUNK_6654G0010   | 5.36E+06   | 5.94E+06   | 1.20E+07   |
| AILUNK_672273G0028 | 1.60E+05   | 1.62E+05   | 1.14E+05   |
| AILUNK_672273G0062 | 7.93E+06   | 8.41E+06   | 1.19E+07   |
| AILUNK_707739G0002 | 3.36E+06   | 3.15E+06   | 2.77E+06   |
| AILUNK_708417G0010 | 7.16E+04   | 6.11E+04   | 6.91E+04   |
| AILUNK_708417G0013 | 2.82E+04   | 4.09E+04   | 3.27E+04   |
| AILUNK_713676G0006 | 5.92E+07   | 5.88E+07   | 6.60E+07   |
| AILUNK_714714G0012 | 5.05E+06   | 3.34E+06   | 3.55E+06   |
| AILUNK_716334G0003 | 1.16E+06   | 7.74E+05   | 4.38E+05   |
| AILUNK_727353G0001 | 2.31E+04   | 3.00E+04   | 1.84E+04   |
| AILUNK_90588G0005  | 3.09E+05   | 3.65E+05   | 5.61E+05   |
| AMDVIR_10150G0005  | 6.79E+05   | 6.77E+05   | 5.73E+05   |
| C75L2_2G0020       | 3.54E+05   | 2.78E+05   | 2.02E+05   |
| C75L2_37G0007      | 4.29E+04   | 4.11E+04   | 4.36E+04   |
| C75L2_62G0014      | 9.63E+06   | 1.15E+07   | 1.54E+07   |
| C75L2_62G0017      | 1.10E+07   | 1.16E+07   | 1.02E+07   |
| C75L2_65G0006      | 1.34E+07   | 1.54E+07   | 1.55E+07   |
| C75L2_68G0009      | 3.18E+09   | 4.18E+09   | 9.47E+09   |
| C75L2_68G0010      | 6.32E+08   | 7.71E+08   | 1.78E+09   |
| C75L2_68G0011      | 4.22E+07   | 3.89E+07   | 3.01E+07   |

|                 |          |          |          |
|-----------------|----------|----------|----------|
| C75L2_80G0001   | 2.60E+05 | 2.35E+05 | 3.65E+05 |
| C75L2_82G0005   | 7.92E+06 | 1.03E+07 | 1.68E+07 |
| C75L2_85G0002   | 1.41E+07 | 1.67E+07 | 3.09E+07 |
| CGFER1_1G0149   | 6.07E+06 | 4.14E+06 | 2.36E+06 |
| CGFER1_1G0232   | 1.28E+07 | 1.14E+07 | 6.49E+06 |
| CGFER1_1G0237   | 8.99E+05 | 7.32E+05 | 4.40E+05 |
| CGFER1_1G0323   | 3.42E+07 | 2.80E+07 | 2.05E+07 |
| CGFER1_1G0374   | 1.59E+06 | 1.42E+06 | 1.17E+06 |
| CGFER1_1G0445   | 8.54E+05 | 8.84E+05 | 9.22E+05 |
| CGFER1_1G0496   | 4.84E+06 | 4.55E+06 | 2.18E+06 |
| CGFER1_1G0567   | 4.40E+06 | 4.87E+06 | 3.10E+06 |
| CGFER1_1G0620   | 3.64E+06 | 2.30E+06 | 1.37E+06 |
| CGFER1_1G0694   | 4.58E+05 | 3.44E+05 | 2.52E+05 |
| CGFER1_1G0772   | 5.45E+05 | 4.85E+05 | 4.14E+05 |
| CGFER1_1G0783   | 8.23E+04 | 6.53E+04 | 4.88E+04 |
| CGFER1_1G0936   | 3.98E+05 | 3.57E+05 | 3.45E+05 |
| CGFER1_1G1018   | 5.00E+06 | 3.73E+06 | 2.23E+06 |
| CGFER1_1G1058   | 7.30E+06 | 6.48E+06 | 3.66E+06 |
| CGFER1_1G1059   | 6.07E+06 | 5.35E+06 | 3.42E+06 |
| CGFER1_1G1085   | 3.18E+07 | 3.39E+07 | 2.32E+07 |
| CGFER1_1G1247   | 1.05E+06 | 1.04E+06 | 8.43E+05 |
| CGFER1_1G1248   | 1.88E+06 | 1.56E+06 | 1.22E+06 |
| CGFER1_1G1454   | 1.63E+07 | 1.43E+07 | 8.61E+06 |
| CGFER1_1G1455   | 3.93E+06 | 3.64E+06 | 1.22E+06 |
| CGFER1_1G1582   | 2.10E+07 | 1.82E+07 | 6.53E+06 |
| CGFER1_1G1648   | 5.54E+05 | 4.79E+05 | 2.99E+05 |
| CGFER1_1G1699   | 2.40E+06 | 2.05E+06 | 9.44E+05 |
| CGFER1_1G1700   | 1.53E+07 | 1.21E+07 | 5.97E+06 |
| CGFER2_10G0053  | 5.59E+06 | 5.82E+06 | 3.88E+06 |
| CGFER2_10G0056  | 1.10E+06 | 6.80E+05 | 3.49E+05 |
| CGFER2_15G0041  | 1.07E+06 | 8.13E+05 | 8.32E+05 |
| CGFER2_19G0044  | 3.39E+06 | 3.95E+06 | 2.08E+06 |
| CGFER2_1G0130   | 1.89E+07 | 2.36E+07 | 3.32E+07 |
| CGFER2_285G0001 | 7.92E+06 | 8.24E+06 | 5.78E+06 |
| CGFER2_31G0009  | 1.63E+07 | 1.36E+07 | 1.19E+07 |
| CGFER2_31G0032  | 7.24E+05 | 9.97E+05 | 3.30E+05 |
| CGFER2_37G0033  | 8.98E+06 | 1.06E+07 | 8.26E+06 |
| CGFER2_801G0004 | 3.43E+05 | 2.64E+05 | 1.54E+05 |
| CGFER2_89G0022  | 3.65E+07 | 4.76E+07 | 4.36E+07 |
| CGFER2_9G0016   | 3.99E+06 | 5.48E+06 | 3.01E+06 |
| CGL2_09769G0002 | 7.67E+06 | 1.01E+07 | 2.04E+07 |
| CGL2_10665G0001 | 3.52E+07 | 3.50E+07 | 3.83E+07 |
| CGL2_10850G0015 | 2.06E+07 | 1.51E+07 | 7.30E+06 |
| CGL2_10933G0004 | 6.83E+05 | 7.32E+05 | 8.19E+05 |
| CGL2_10933G0008 | 1.17E+07 | 1.03E+07 | 6.53E+06 |
| CGL2_10933G0018 | 4.15E+07 | 3.70E+07 | 1.57E+07 |
| CGL2_10933G0023 | 3.42E+06 | 2.45E+06 | 1.55E+06 |
| CGL2_10933G0028 | 3.21E+05 | 2.97E+05 | 2.56E+05 |
| CGL2_10954G0002 | 5.51E+06 | 4.45E+06 | 9.88E+05 |
| CGL2_10954G0003 | 1.39E+07 | 1.11E+07 | 3.06E+06 |
| CGL2_10961G0021 | 1.30E+06 | 1.25E+06 | 7.13E+05 |
| CGL2_10961G0028 | 2.25E+06 | 3.20E+06 | 5.18E+06 |
| CGL2_10961G0029 | 8.70E+06 | 8.13E+06 | 4.89E+06 |
| CGL2_10961G0052 | 1.55E+07 | 1.27E+07 | 4.98E+06 |
| CGL2_10961G0058 | 3.03E+06 | 2.81E+06 | 2.56E+06 |
| CGL2_10965G0024 | 2.16E+06 | 2.25E+06 | 1.20E+06 |
| CGL2_11067G0001 | 5.08E+07 | 4.44E+07 | 2.26E+07 |

|                   |          |          |          |
|-------------------|----------|----------|----------|
| CGL2_11067G0001.1 | 1.09E+07 | 8.99E+06 | 2.40E+06 |
| CGL2_11067G0002   | 3.72E+06 | 3.42E+06 | 1.50E+06 |
| CGL2_11067G0003   | 6.79E+07 | 6.09E+07 | 1.83E+07 |
| CGL2_11067G0010   | 4.89E+07 | 4.68E+07 | 1.44E+07 |
| CGL2_11067G0021   | 1.71E+07 | 1.41E+07 | 2.26E+06 |
| CGL2_11067G0024   | 1.94E+06 | 1.69E+06 | 7.22E+05 |
| CGL2_11067G0033   | 1.73E+07 | 1.49E+07 | 6.53E+06 |
| CGL2_11067G0037   | 4.14E+07 | 3.58E+07 | 1.24E+07 |
| CGL2_11067G0038   | 2.19E+07 | 1.89E+07 | 6.68E+06 |
| CGL2_11067G0040   | 6.15E+05 | 5.95E+05 | 2.04E+05 |
| CGL2_11068G0022   | 5.48E+05 | 4.62E+05 | 2.10E+05 |
| CGL2_11068G0024   | 4.43E+06 | 3.62E+06 | 2.15E+06 |
| CGL2_11068G0029   | 4.53E+05 | 4.19E+05 | 4.73E+05 |
| CGL2_11068G0031   | 3.71E+06 | 3.22E+06 | 1.85E+06 |
| CGL2_11068G0036   | 2.51E+06 | 2.05E+06 | 7.57E+05 |
| CGL2_11068G0070   | 1.55E+05 | 1.47E+05 | 1.58E+05 |
| CGL2_11068G0072   | 9.28E+06 | 7.57E+06 | 2.64E+06 |
| CGL2_11068G0075   | 1.71E+05 | 1.41E+05 | 6.04E+04 |
| CGL2_11068G0090   | 6.96E+07 | 6.86E+07 | 2.06E+07 |
| CGL2_11068G0092   | 9.59E+06 | 8.55E+06 | 8.47E+06 |
| CGL2_11068G0114   | 1.88E+07 | 1.60E+07 | 4.93E+06 |
| CGL2_11068G0116   | 1.92E+06 | 1.86E+06 | 4.23E+05 |
| CGL2_11068G0117   | 2.73E+06 | 2.33E+06 | 5.44E+05 |
| CGL2_11068G0120   | 2.01E+07 | 1.51E+07 | 3.86E+06 |
| CGL2_11068G0123   | 2.09E+07 | 1.73E+07 | 4.75E+06 |
| CGL2_11077G0020   | 5.59E+06 | 5.36E+06 | 1.16E+06 |
| CGL2_11077G0025   | 4.20E+05 | 3.73E+05 | 3.09E+05 |
| CGL2_11077G0032   | 6.17E+05 | 5.13E+05 | 3.19E+05 |
| CGL2_11080G0001   | 1.65E+07 | 1.41E+07 | 2.63E+06 |
| CGL2_11111G0014   | 3.12E+06 | 2.84E+06 | 1.43E+06 |
| CGL2_11111G0030   | 5.37E+06 | 4.85E+06 | 2.90E+06 |
| CGL2_11111G0036   | 9.32E+06 | 8.36E+06 | 3.88E+06 |
| CGL2_11111G0037   | 2.30E+06 | 2.47E+06 | 2.59E+06 |
| CGL2_11111G0043   | 2.97E+06 | 2.79E+06 | 1.24E+06 |
| CGL2_11111G0050   | 1.19E+06 | 1.14E+06 | 1.31E+06 |
| CGL2_11111G0051   | 2.27E+06 | 2.31E+06 | 2.29E+06 |
| CGL2_11111G0065   | 7.03E+06 | 6.71E+06 | 1.56E+06 |
| CGL2_11111G0079   | 3.75E+06 | 3.39E+06 | 1.33E+06 |
| CGL2_11111G0093   | 4.72E+06 | 4.28E+06 | 3.01E+06 |
| CGL2_11111G0095   | 3.13E+06 | 2.71E+06 | 9.52E+05 |
| CGL2_11111G0099   | 4.69E+07 | 3.88E+07 | 6.98E+06 |
| CGL2_11111G0103   | 3.13E+07 | 2.62E+07 | 7.31E+06 |
| CGL2_11111G0105   | 7.07E+05 | 6.80E+05 | 4.62E+05 |
| CGL2_11111G0107   | 4.07E+06 | 3.40E+06 | 7.48E+05 |
| CGL2_11111G0109   | 3.09E+06 | 2.87E+06 | 8.41E+05 |
| CGL2_11111G0110   | 3.70E+05 | 3.99E+05 | 2.37E+05 |
| CGL2_11172G0001   | 1.07E+07 | 8.08E+06 | 3.12E+06 |
| CGL2_11172G0022   | 8.41E+06 | 8.11E+06 | 3.81E+06 |
| CGL2_11172G0029   | 1.25E+06 | 1.15E+06 | 8.76E+05 |
| CGL2_11172G0034   | 3.05E+06 | 2.68E+06 | 1.13E+06 |
| CGL2_11172G0052   | 3.41E+06 | 3.05E+06 | 1.43E+06 |
| CGL2_11172G0055   | 8.66E+07 | 6.76E+07 | 1.29E+07 |
| CGL2_11172G0060   | 8.64E+05 | 7.76E+05 | 5.66E+05 |
| CGL2_11172G0061   | 1.50E+07 | 1.25E+07 | 4.13E+06 |
| CGL2_11172G0073   | 2.37E+07 | 2.18E+07 | 3.29E+06 |
| CGL2_11181G0004   | 1.14E+06 | 1.01E+06 | 6.23E+05 |
| CGL2_11181G0006   | 3.11E+05 | 3.83E+05 | 5.63E+05 |

|                 |          |          |          |
|-----------------|----------|----------|----------|
| CGL2_11181G0025 | 2.06E+08 | 2.09E+08 | 2.93E+07 |
| CGL2_11181G0031 | 4.05E+06 | 3.59E+06 | 1.78E+06 |
| CGL2_11181G0032 | 2.09E+06 | 1.94E+06 | 1.48E+06 |
| CGL2_11181G0033 | 8.54E+06 | 7.55E+06 | 4.41E+06 |
| CGL2_11181G0046 | 5.98E+05 | 5.99E+05 | 3.59E+05 |
| CGL2_11181G0048 | 1.16E+06 | 1.10E+06 | 1.06E+06 |
| CGL2_11181G0052 | 5.75E+06 | 4.97E+06 | 2.00E+06 |
| CGL2_11181G0059 | 3.52E+05 | 3.14E+05 | 2.05E+05 |
| CGL2_11181G0069 | 4.15E+07 | 3.64E+07 | 1.12E+07 |
| CGL2_11184G0005 | 2.39E+06 | 2.10E+06 | 8.40E+05 |
| CGL2_11184G0023 | 3.06E+06 | 2.82E+06 | 5.17E+05 |
| CGL2_11184G0033 | 4.36E+06 | 4.43E+06 | 1.29E+06 |
| CGL2_11184G0047 | 1.39E+07 | 1.04E+07 | 2.92E+06 |
| CGL2_11184G0053 | 4.71E+06 | 4.31E+06 | 2.44E+06 |
| CGL2_11195G0004 | 2.66E+06 | 2.45E+06 | 2.58E+06 |
| CGL2_11195G0006 | 4.25E+06 | 4.32E+06 | 4.57E+06 |
| CGL2_11195G0010 | 6.12E+06 | 5.42E+06 | 5.60E+06 |
| CGL2_11195G0013 | 1.66E+07 | 1.67E+07 | 1.68E+07 |
| CGL2_11195G0016 | 3.09E+05 | 3.15E+05 | 3.01E+05 |
| CGL2_11195G0021 | 6.42E+06 | 6.62E+06 | 5.78E+06 |
| CGL2_11195G0037 | 2.75E+06 | 2.71E+06 | 3.21E+06 |
| CGL2_11195G0040 | 6.97E+05 | 7.62E+05 | 8.20E+05 |
| CGL2_11212G0002 | 2.11E+07 | 1.62E+07 | 4.48E+06 |
| CGL2_11212G0003 | 8.23E+07 | 6.85E+07 | 9.48E+06 |
| CGL2_11212G0007 | 3.29E+06 | 2.81E+06 | 1.26E+06 |
| CGL2_11212G0018 | 1.27E+07 | 1.05E+07 | 5.90E+06 |
| CGL2_11212G0022 | 7.65E+07 | 6.07E+07 | 2.92E+07 |
| CGL2_11212G0031 | 9.96E+07 | 7.59E+07 | 2.20E+07 |
| CGL2_11212G0046 | 1.09E+06 | 9.48E+05 | 5.62E+05 |
| CGL2_11212G0054 | 1.08E+07 | 1.00E+07 | 5.10E+06 |
| CGL2_11212G0068 | 2.42E+06 | 1.85E+06 | 5.76E+05 |
| CGL2_11212G0079 | 1.08E+07 | 9.63E+06 | 3.32E+06 |
| CGL2_11212G0083 | 6.73E+06 | 6.12E+06 | 2.86E+06 |
| CGL2_11212G0085 | 1.24E+07 | 1.08E+07 | 1.53E+06 |
| CGL2_11212G0088 | 4.69E+05 | 4.36E+05 | 3.15E+05 |
| CGL2_11212G0111 | 1.84E+06 | 1.64E+06 | 7.59E+05 |
| CGL2_11212G0117 | 2.41E+07 | 1.89E+07 | 4.91E+06 |
| CGL2_11212G0121 | 1.05E+06 | 1.76E+06 | 3.49E+06 |
| CGL2_11212G0134 | 9.24E+05 | 9.51E+05 | 5.59E+05 |
| CGL2_11212G0140 | 1.69E+06 | 1.56E+06 | 6.22E+05 |
| CGL2_11212G0141 | 6.41E+05 | 6.21E+05 | 3.76E+05 |
| CGL2_11226G0017 | 1.35E+06 | 1.16E+06 | 1.09E+06 |
| CGL2_11233G0046 | 3.93E+07 | 3.67E+07 | 9.25E+06 |
| CGL2_11233G0057 | 2.91E+07 | 2.48E+07 | 2.75E+07 |
| CGL2_11233G0062 | 2.76E+06 | 2.46E+06 | 6.88E+05 |
| CGL2_11233G0063 | 1.07E+07 | 9.49E+06 | 6.07E+06 |
| CGL2_11233G0064 | 3.55E+07 | 3.03E+07 | 8.28E+06 |
| CGL2_11238G0030 | 8.41E+05 | 7.62E+05 | 3.20E+05 |
| CGL2_11238G0040 | 6.28E+05 | 5.14E+05 | 3.01E+05 |
| CGL2_11238G0068 | 1.08E+06 | 8.62E+05 | 2.93E+05 |
| CGL2_11238G0069 | 3.01E+06 | 2.69E+06 | 1.96E+06 |
| CGL2_11247G0020 | 1.33E+06 | 1.36E+06 | 3.77E+05 |
| CGL2_11247G0021 | 1.17E+06 | 1.03E+06 | 3.78E+05 |
| CGL2_11247G0023 | 1.19E+06 | 1.13E+06 | 9.04E+05 |
| CGL2_11276G0050 | 5.52E+07 | 5.03E+07 | 2.98E+07 |
| CGL2_11276G0067 | 1.86E+06 | 1.74E+06 | 9.74E+05 |
| CGL2_11276G0073 | 1.06E+06 | 9.45E+05 | 5.33E+05 |

|                 |          |          |          |
|-----------------|----------|----------|----------|
| CGL2_11276G0088 | 6.34E+06 | 5.87E+06 | 2.49E+06 |
| CGL2_11276G0099 | 6.67E+05 | 5.99E+05 | 4.42E+05 |
| CGL2_11276G0100 | 2.03E+06 | 1.68E+06 | 5.81E+05 |
| CGL2_11276G0110 | 1.35E+06 | 1.15E+06 | 6.00E+05 |
| CGL2_11276G0111 | 1.22E+07 | 1.11E+07 | 5.28E+06 |
| CGL2_11276G0149 | 4.23E+06 | 4.22E+06 | 4.28E+06 |
| CGL2_11276G0155 | 2.24E+06 | 1.29E+06 | 4.80E+05 |
| CGL2_11276G0156 | 6.70E+06 | 6.87E+06 | 6.45E+06 |
| CGL2_11276G0159 | 1.66E+06 | 1.52E+06 | 1.08E+06 |
| CGL2_11276G0172 | 1.14E+08 | 1.14E+08 | 2.28E+07 |
| CGL2_11276G0191 | 1.90E+06 | 2.05E+06 | 1.67E+06 |
| CGL2_11277G0024 | 7.28E+06 | 7.07E+06 | 3.28E+06 |
| CGL2_11277G0031 | 1.26E+06 | 1.10E+06 | 8.89E+05 |
| CGL2_11277G0032 | 1.24E+06 | 1.14E+06 | 5.84E+05 |
| CGL2_11277G0054 | 2.67E+07 | 2.74E+07 | 1.08E+07 |
| CGL2_11277G0057 | 1.77E+06 | 1.66E+06 | 1.22E+06 |
| CGL2_11277G0085 | 1.94E+06 | 1.96E+06 | 8.44E+05 |
| CGL2_11277G0088 | 5.51E+05 | 5.18E+05 | 2.57E+05 |
| CGL2_11277G0089 | 6.50E+06 | 6.36E+06 | 1.93E+06 |
| CGL2_11277G0094 | 3.29E+06 | 3.36E+06 | 3.19E+06 |
| CGL2_11277G0101 | 1.61E+06 | 1.38E+06 | 1.13E+06 |
| CGL2_11277G0104 | 1.23E+06 | 1.23E+06 | 9.60E+05 |
| CGL2_11277G0121 | 4.58E+06 | 4.56E+06 | 4.99E+06 |
| CGL2_11277G0132 | 5.43E+05 | 5.66E+05 | 6.41E+05 |
| CGL2_11277G0232 | 5.41E+06 | 5.04E+06 | 3.18E+06 |
| CGL2_11277G0246 | 5.61E+06 | 4.78E+06 | 9.45E+05 |
| CGL2_11277G0248 | 9.41E+06 | 9.14E+06 | 3.65E+06 |
| CGL2_11277G0252 | 3.82E+06 | 3.39E+06 | 3.18E+06 |
| CGL2_11277G0285 | 4.00E+06 | 3.60E+06 | 2.93E+06 |
| CGL2_11277G0292 | 3.36E+06 | 3.23E+06 | 1.67E+06 |
| CGL2_11277G0295 | 1.07E+06 | 9.65E+05 | 7.44E+05 |
| CGL2_11346G0031 | 5.19E+05 | 5.62E+05 | 6.98E+05 |
| CGL2_11346G0047 | 8.18E+05 | 8.01E+05 | 6.79E+05 |
| CGL2_11346G0064 | 1.03E+06 | 9.31E+05 | 7.14E+05 |
| CGL2_11346G0077 | 4.38E+06 | 4.04E+06 | 1.41E+06 |
| CGL2_11346G0078 | 2.61E+06 | 2.38E+06 | 1.21E+06 |
| CGL2_11346G0080 | 4.05E+07 | 3.37E+07 | 1.35E+07 |
| CGL2_11346G0081 | 2.46E+06 | 2.08E+06 | 6.64E+05 |
| CGL2_11346G0083 | 3.18E+05 | 3.33E+05 | 3.19E+05 |
| CGL2_11346G0088 | 4.57E+07 | 3.74E+07 | 1.07E+07 |
| CGL2_11346G0126 | 1.28E+07 | 1.18E+07 | 1.06E+07 |
| CGL2_11346G0132 | 7.34E+06 | 6.50E+06 | 7.15E+06 |
| CGL2_11346G0135 | 1.27E+07 | 1.16E+07 | 5.52E+06 |
| CGL2_11346G0155 | 9.61E+05 | 8.05E+05 | 2.57E+05 |
| CGL2_11346G0173 | 7.79E+05 | 5.34E+05 | 3.03E+05 |
| CGL2_11364G0001 | 3.56E+06 | 3.15E+06 | 3.16E+06 |
| CGL2_11364G0007 | 6.02E+06 | 6.81E+06 | 8.55E+06 |
| CGL2_11364G0008 | 2.78E+06 | 2.93E+06 | 3.59E+06 |
| CGL2_11364G0013 | 7.71E+06 | 7.76E+06 | 8.08E+06 |
| CGL2_11364G0020 | 2.29E+07 | 2.30E+07 | 2.49E+07 |
| CGL2_11364G0027 | 5.55E+05 | 5.19E+05 | 5.48E+05 |
| CGL2_11364G0029 | 1.55E+06 | 1.60E+06 | 1.69E+06 |
| CGL2_11386G0002 | 6.72E+06 | 5.19E+06 | 9.41E+05 |
| CGL2_11386G0004 | 1.25E+07 | 1.00E+07 | 6.02E+06 |
| CGL2_11386G0008 | 1.40E+07 | 1.52E+07 | 1.84E+07 |
| CGL2_11386G0018 | 5.34E+05 | 5.27E+05 | 5.78E+05 |
| CGL2_11389G0010 | 6.33E+06 | 5.28E+06 | 2.06E+06 |

|                        |          |          |          |
|------------------------|----------|----------|----------|
| CGL2_11389G0022        | 1.59E+07 | 1.61E+07 | 1.57E+07 |
| CGL2_11389G0034        | 8.25E+06 | 7.28E+06 | 3.07E+06 |
| CGL2_11390G0019        | 2.29E+06 | 2.46E+06 | 1.03E+06 |
| CGL2_11390G0021        | 6.58E+06 | 5.89E+06 | 2.42E+06 |
| CGL2_11390G0033        | 4.61E+06 | 4.15E+06 | 1.94E+06 |
| CGL2_11390G0035        | 1.05E+06 | 8.82E+05 | 5.86E+05 |
| CGL2_11391G0003        | 1.21E+06 | 1.22E+06 | 7.37E+05 |
| FWFARIM_1163G02507     | 2.38E+06 | 2.40E+06 | 2.08E+06 |
| FWFARIM_1493G03013     | 1.44E+08 | 1.31E+08 | 1.55E+08 |
| FWFARIM_1493G03055     | 9.21E+05 | 7.78E+05 | 5.66E+05 |
| FWFARIM_2183G04096     | 1.27E+06 | 1.41E+06 | 1.00E+06 |
| FWFARIM_2336G04516     | 1.99E+06 | 2.10E+06 | 2.42E+06 |
| FWFARIM_236G00625      | 1.04E+06 | 9.38E+05 | 9.53E+05 |
| FWFARIM_2410G04858     | 3.32E+05 | 3.41E+05 | 2.69E+05 |
| FWFARIM_250G00713      | 8.78E+04 | 5.90E+04 | 5.96E+04 |
| FWFARIM_2517G05178     | 4.29E+06 | 4.22E+06 | 8.76E+06 |
| FWFARIM_2698G05571     | 6.14E+04 | 6.21E+04 | 3.98E+06 |
| FWFARIM_2823G05914     | 1.63E+06 | 2.01E+06 | 1.48E+06 |
| FWFARIM_2857G06087     | 5.83E+05 | 6.08E+05 | 5.74E+05 |
| FWFARIM_2936G06288     | 2.46E+06 | 2.49E+06 | 2.36E+06 |
| FWFARIM_3186G06715     | 2.72E+05 | 2.62E+05 | 2.44E+05 |
| FWFARIM_323G00842      | 9.98E+06 | 1.15E+07 | 1.35E+07 |
| FWFARIM_3818G07773     | 2.48E+06 | 1.72E+06 | 1.37E+06 |
| FWFARIM_3837G07807     | 1.48E+06 | 1.16E+06 | 7.74E+05 |
| FWFARIM_3837G07835     | 4.59E+05 | 4.37E+05 | 3.18E+05 |
| FWFARIM_3845G07843     | 1.26E+07 | 1.40E+07 | 1.25E+07 |
| FWFARIM_4081G08244     | 7.66E+05 | 6.78E+05 | 5.04E+05 |
| FWFARIM_4238G08633     | 1.54E+06 | 1.37E+06 | 6.44E+05 |
| FWFARIM_4322G08695     | 9.43E+05 | 9.62E+05 | 1.06E+06 |
| FWFARIM_4393G08822     | 5.11E+06 | 4.22E+06 | 2.87E+06 |
| FWFARIM_4586G09067     | 1.83E+07 | 1.62E+07 | 2.57E+07 |
| FWFARIM_4776G09238     | 9.06E+06 | 9.51E+06 | 1.41E+07 |
| FWFARIM_4781G09259     | 1.29E+06 | 1.22E+06 | 2.67E+06 |
| FWFARIM_5364G10317     | 2.50E+07 | 2.58E+07 | 3.24E+07 |
| FWFARIM_684G01454      | 4.35E+08 | 3.82E+08 | 3.10E+08 |
| FWFDPL_26G0068         | 1.13E+06 | 1.04E+06 | 8.61E+05 |
| FWFDPL_344.0G0059      | 2.49E+07 | 2.96E+07 | 2.27E+07 |
| FWFDPL_38G0025         | 6.55E+05 | 7.59E+05 | 3.52E+05 |
| FWFDPL_611.0G0011      | 1.22E+05 | 1.03E+05 | 9.05E+04 |
| FWFDPL_611.0G0018      | 6.38E+04 | 7.58E+04 | 9.81E+04 |
| FWFDPL_63.1G0026       | 3.09E+06 | 1.74E+06 | 5.32E+05 |
| FWFSBA3_20.10831.23G00 | 1.51E+06 | 1.44E+06 | 9.80E+05 |
| FWFSBA3_215.125499.24C | 3.95E+06 | 3.15E+06 | 1.73E+06 |
| FWFSBA3_337.110077.23C | 9.22E+07 | 1.14E+08 | 1.33E+08 |
| FWFSBA3_50.49185.22G00 | 8.86E+06 | 8.52E+06 | 8.69E+06 |
| FWFSBA3_50.49185.22G00 | 5.94E+06 | 6.94E+06 | 1.26E+07 |
| FWFSBA3_79.87816.23G00 | 4.06E+06 | 3.87E+06 | 3.82E+06 |
| S4JAP2_3592G0002       | 2.43E+05 | 3.15E+05 | 3.84E+05 |
| S4JAPL_00061G0002      | 8.50E+06 | 1.14E+07 | 2.12E+07 |
| S4JAPL_00061G0003      | 1.25E+06 | 1.40E+06 | 1.84E+06 |
| S4JAPL_00061G0005      | 1.09E+06 | 1.04E+06 | 1.41E+06 |
| S4JAPL_00109G0001      | 1.83E+05 | 1.57E+05 | 1.36E+05 |
| S4JAPL_00223G0002      | 9.50E+06 | 1.20E+07 | 2.20E+07 |
| S4JAPL_00325G0005      | 8.83E+06 | 1.06E+07 | 1.70E+07 |
| S4JAPL_00325G0007      | 5.84E+06 | 6.95E+06 | 1.18E+07 |
| S4JAPL_00457G0002      | 1.40E+06 | 1.56E+06 | 2.78E+06 |
| S4JAPL_00548G0004      | 3.78E+05 | 4.42E+05 | 6.91E+05 |

|                   |          |          |          |
|-------------------|----------|----------|----------|
| S4JAPL_00711G0005 | 1.57E+07 | 1.84E+07 | 1.33E+07 |
| S4JAPL_12840G0002 | 8.48E+06 | 1.01E+07 | 1.97E+07 |
| S4JAPL_13214G0002 | 1.95E+06 | 2.59E+06 | 3.71E+06 |
| S4JAPL_13214G0006 | 8.10E+06 | 9.46E+06 | 1.51E+07 |
| S4JAPL_13214G0011 | 6.38E+06 | 8.74E+06 | 1.66E+07 |
| S4JAPL_13214G0013 | 1.44E+07 | 2.30E+07 | 5.30E+07 |
| S4JAPL_13214G0036 | 9.67E+06 | 1.10E+07 | 1.67E+07 |
| S4JAPL_13214G0037 | 2.72E+05 | 2.75E+05 | 3.04E+05 |
| S4JAPL_13214G0061 | 4.61E+06 | 5.17E+06 | 9.16E+06 |
| S4JAPL_14887G0056 | 2.39E+05 | 2.22E+05 | 1.88E+05 |
| S4JAPL_14887G0067 | 1.09E+06 | 1.44E+06 | 2.93E+06 |
| S4JAPL_17068G0006 | 1.30E+07 | 1.55E+07 | 2.23E+07 |
| S4JAPL_17068G0007 | 2.45E+06 | 2.71E+06 | 4.47E+06 |
| S4JAPL_17068G0014 | 1.49E+06 | 1.90E+06 | 3.19E+06 |
| S4JAPL_17068G0040 | 2.72E+06 | 3.17E+06 | 5.17E+06 |
| S4JAPL_17068G0074 | 4.67E+05 | 4.65E+05 | 7.09E+05 |
| S4JAPL_17068G0084 | 3.42E+06 | 3.86E+06 | 6.31E+06 |
| S4JAPL_17087G0010 | 1.13E+07 | 1.40E+07 | 2.23E+07 |
| S4JAPL_17087G0068 | 2.11E+06 | 2.83E+06 | 5.74E+06 |
| S4JAPL_17112G0007 | 5.74E+06 | 6.25E+06 | 1.17E+07 |
| S4JAPL_17112G0030 | 3.01E+07 | 3.50E+07 | 5.43E+07 |
| S4JAPL_17112G0033 | 9.87E+05 | 1.13E+06 | 2.04E+06 |
| S4JAPL_17112G0048 | 2.39E+06 | 3.06E+06 | 6.43E+06 |
| S4JAPL_17112G0049 | 7.02E+06 | 8.20E+06 | 1.50E+07 |
| S4JAPL_17112G0054 | 4.92E+07 | 6.12E+07 | 1.30E+08 |
| S4JAPL_17112G0056 | 5.15E+05 | 6.54E+05 | 1.12E+06 |
| S4JAPL_17112G0057 | 1.42E+07 | 1.95E+07 | 3.80E+07 |
| S4JAPL_17112G0058 | 3.81E+06 | 3.61E+06 | 4.28E+06 |
| S4JAPL_17298G0006 | 1.76E+06 | 2.47E+06 | 5.03E+06 |
| S4JAPL_17298G0042 | 1.29E+06 | 1.52E+06 | 3.53E+06 |
| S4JAPL_17298G0047 | 8.81E+06 | 9.87E+06 | 2.16E+07 |
| S4JAPL_17298G0069 | 8.76E+05 | 1.02E+06 | 2.15E+06 |
| S4JAPL_17298G0100 | 2.10E+07 | 2.80E+07 | 5.90E+07 |
| S4JAPL_17357G0009 | 6.06E+05 | 6.47E+05 | 1.12E+06 |
| S4JAPL_17357G0067 | 4.96E+05 | 6.95E+05 | 1.16E+06 |
| S4JAPL_17357G0081 | 1.54E+06 | 1.54E+06 | 9.93E+05 |
| S4JAPL_17357G0084 | 2.30E+06 | 3.07E+06 | 5.56E+06 |
| S4JAPL_17357G0091 | 9.82E+06 | 1.26E+07 | 2.54E+07 |
| S4JAPL_17387G0015 | 2.12E+06 | 2.67E+06 | 4.03E+06 |
| S4JAPL_17393G0006 | 3.09E+07 | 4.21E+07 | 9.92E+07 |
| S4JAPL_17393G0010 | 1.36E+07 | 9.76E+06 | 8.01E+06 |
| S4JAPL_17393G0038 | 7.14E+05 | 9.40E+05 | 1.59E+06 |
| S4JAPL_17428G0006 | 1.34E+06 | 1.17E+06 | 1.05E+06 |
| S4JAPL_17428G0007 | 5.51E+06 | 7.29E+06 | 1.93E+07 |
| S4JAPL_17428G0033 | 5.62E+06 | 6.23E+06 | 1.16E+07 |
| S4JAPL_17428G0038 | 1.65E+07 | 1.89E+07 | 3.34E+07 |
| S4JAPL_17433G0002 | 1.82E+06 | 1.87E+06 | 2.95E+06 |
| S4JAPL_17433G0003 | 2.06E+06 | 2.35E+06 | 4.27E+06 |
| S4JAPL_17433G0013 | 3.29E+06 | 3.76E+06 | 6.93E+06 |
| S4JAPL_17433G0048 | 2.65E+07 | 3.77E+07 | 8.34E+07 |
| S4JAPL_17433G0051 | 4.33E+06 | 5.33E+06 | 8.56E+06 |
| S4JAPL_17433G0052 | 2.62E+06 | 3.70E+06 | 8.19E+06 |
| S4JAPL_17439G0019 | 2.66E+05 | 2.90E+05 | 5.67E+05 |
| S4JAPL_17439G0022 | 3.67E+06 | 4.86E+06 | 9.15E+06 |
| S4JAPL_17442G0009 | 5.72E+06 | 6.18E+06 | 9.97E+06 |
| S4JAPL_17445G0044 | 3.98E+06 | 4.97E+06 | 8.08E+06 |
| S4JAPL_17449G0028 | 1.06E+07 | 1.07E+07 | 1.07E+07 |

|                    |          |          |          |
|--------------------|----------|----------|----------|
| S4JAPL_17462G0024  | 1.21E+07 | 1.50E+07 | 3.44E+07 |
| S4JAPL_17472G0021  | 1.70E+05 | 1.96E+05 | 3.22E+05 |
| S4JAPL_17472G0025  | 3.00E+05 | 3.48E+05 | 5.30E+05 |
| S4JAPL_17472G0039  | 3.56E+06 | 4.76E+06 | 9.63E+06 |
| S4JAPL_17472G0048  | 1.03E+07 | 1.04E+07 | 1.30E+07 |
| S4JAPL_17481G0003  | 2.71E+06 | 3.74E+06 | 8.30E+06 |
| S4JAPL_17498G0008  | 7.79E+06 | 8.36E+06 | 9.40E+06 |
| S4JAPL_17500G0036  | 7.71E+06 | 9.16E+06 | 1.67E+07 |
| S4JAR1_115G0003    | 8.33E+05 | 9.55E+05 | 1.20E+06 |
| S4JAR1_121G0022    | 8.67E+05 | 9.98E+05 | 1.72E+06 |
| S4JAR1_188G0018    | 2.84E+06 | 1.68E+06 | 1.04E+06 |
| S4JAR1_23G0007     | 1.07E+04 | 1.22E+04 | 1.07E+04 |
| S4JAR1_23G0104     | 7.77E+06 | 7.43E+06 | 8.08E+06 |
| S4JAR1_63G0002     | 9.92E+05 | 7.89E+05 | 7.85E+05 |
| S4JCPL_00021G0014  | 1.06E+07 | 1.07E+07 | 1.07E+07 |
| S4JCPL_00049G0061  | 1.93E+06 | 1.74E+06 | 1.67E+06 |
| S4JCPL_00118G0032  | 7.63E+06 | 6.00E+06 | 4.55E+06 |
| S4JCPL_00137G0012  | 1.03E+07 | 1.45E+07 | 1.61E+07 |
| UBABSL4_10312G0003 | 1.14E+05 | 9.07E+04 | 9.57E+04 |
| UBABSL4_10765G0001 | 1.63E+06 | 1.49E+06 | 1.54E+06 |
| UBABSL4_11135G0002 | 2.02E+07 | 1.86E+07 | 1.54E+07 |
| UBABSL4_11218G0003 | 9.65E+06 | 8.14E+06 | 6.50E+06 |
| UBABSL4_11504G0002 | 1.54E+05 | 1.57E+05 | 1.47E+05 |
| UBABSL4_11601G0010 | 5.35E+03 | 6.67E+05 | 5.39E+03 |
| UBABSL4_11601G0014 | 9.09E+05 | 1.15E+06 | 1.36E+06 |
| UBABSL4_11671G0001 | 1.17E+07 | 1.17E+07 | 1.04E+07 |
| UBABSL4_11756G0004 | 2.51E+07 | 2.34E+07 | 2.24E+07 |
| UBABSL4_11853G0009 | 3.20E+05 | 3.08E+05 | 2.71E+05 |
| UBABSL4_12078G0002 | 1.16E+07 | 1.10E+07 | 8.51E+06 |
| UBABSL4_12165G0003 | 3.21E+06 | 3.34E+06 | 3.17E+06 |
| UBABSL4_12259G0011 | 1.02E+08 | 1.03E+08 | 1.09E+08 |
| UBABSL4_12259G0014 | 8.19E+06 | 7.87E+06 | 4.62E+06 |
| UBABSL4_12862G0001 | 3.44E+06 | 3.51E+06 | 3.86E+06 |
| UBABSL4_2194G0001  | 8.25E+05 | 7.85E+05 | 4.89E+05 |
| UBABSL4_3115G0001  | 2.54E+05 | 1.98E+05 | 2.51E+05 |
| UBABSL4_3335G0012  | 3.11E+06 | 3.24E+06 | 2.43E+06 |
| UBABSL4_3478G0006  | 1.26E+06 | 1.57E+06 | 2.14E+06 |
| UBABSL4_3895G0005  | 8.35E+06 | 9.12E+06 | 8.14E+06 |
| UBABSL4_4347G0006  | 9.09E+07 | 8.32E+07 | 5.69E+07 |
| UBABSL4_7009G0008  | 1.04E+07 | 9.43E+06 | 8.21E+06 |
| UBABSL4_7131G0001  | 4.71E+05 | 4.47E+05 | 6.05E+05 |
| UBABSL4_8849G0007  | 1.43E+06 | 1.36E+06 | 8.88E+05 |
| UBABSL4_9211G0003  | 4.80E+06 | 4.67E+06 | 3.72E+06 |
| UBABSL4_9214G0008  | 1.22E+06 | 1.09E+06 | 7.08E+05 |
| UBABSL4_9408G0002  | 1.54E+06 | 1.40E+06 | 1.09E+06 |
| UBAL2_7931G0011    | 3.81E+05 | 4.71E+05 | 5.10E+05 |
| UBAL2_7931G0042    | 1.10E+06 | 9.55E+05 | 1.87E+06 |
| UBAL2_7931G0054    | 8.01E+05 | 7.69E+05 | 1.21E+06 |
| UBAL2_7931G0064    | 5.43E+05 | 6.73E+05 | 5.91E+05 |
| UBAL2_7931G0071    | 3.20E+06 | 4.09E+06 | 8.34E+06 |
| UBAL2_7931G0159    | 4.53E+06 | 5.50E+06 | 6.96E+06 |
| UBAL2_7931G0167    | 3.17E+06 | 2.72E+06 | 1.69E+06 |
| UBAL2_7931G0171    | 1.56E+06 | 1.51E+06 | 1.63E+06 |
| UBAL2_7931G0176    | 1.31E+06 | 1.49E+06 | 1.73E+06 |
| UBAL2_7931G0191    | 3.02E+06 | 2.57E+06 | 4.53E+06 |
| UBAL2_7931G0208    | 6.87E+06 | 8.89E+06 | 1.93E+07 |
| UBAL2_7931G0212    | 2.00E+06 | 2.39E+06 | 3.99E+06 |



|                 |          |          |          |
|-----------------|----------|----------|----------|
| UBAL2_7931G0218 | 4.04E+05 | 4.50E+05 | 9.64E+05 |
| UBAL2_7931G0226 | 3.42E+07 | 4.51E+07 | 1.07E+08 |
| UBAL2_7931G0227 | 1.43E+06 | 1.01E+06 | 9.12E+05 |
| UBAL2_7931G0247 | 2.94E+06 | 4.06E+06 | 8.19E+06 |
| UBAL2_7931G0249 | 2.89E+06 | 3.96E+06 | 6.65E+06 |
| UBAL2_7931G0253 | 1.81E+07 | 2.26E+07 | 4.28E+07 |
| UBAL2_7931G0256 | 3.90E+07 | 4.53E+07 | 4.76E+07 |
| UBAL2_7931G0268 | 1.64E+05 | 1.46E+05 | 1.78E+05 |
| UBAL2_7931G0321 | 3.36E+06 | 3.78E+06 | 6.08E+06 |
| UBAL2_7931G0329 | 2.84E+05 | 2.75E+05 | 5.91E+05 |
| UBAL2_7931G0335 | 1.24E+07 | 1.46E+07 | 3.03E+07 |
| UBAL2_7931G0341 | 2.64E+06 | 2.72E+06 | 2.21E+06 |
| UBAL2_7931G0357 | 1.32E+07 | 1.54E+07 | 2.86E+07 |
| UBAL2_7931G0444 | 1.60E+05 | 1.57E+05 | 5.41E+05 |
| UBAL2_7931G0446 | 7.20E+05 | 8.17E+05 | 2.65E+06 |
| UBAL2_8027G0014 | 1.13E+06 | 1.08E+06 | 1.78E+06 |
| UBAL2_8027G0019 | 4.68E+05 | 5.64E+05 | 1.25E+06 |
| UBAL2_8027G0031 | 3.87E+07 | 4.46E+07 | 1.06E+08 |
| UBAL2_8027G0041 | 1.70E+06 | 1.64E+06 | 2.39E+06 |
| UBAL2_8049G0022 | 2.36E+06 | 2.70E+06 | 5.92E+06 |
| UBAL2_8049G0027 | 1.47E+05 | 1.44E+05 | 1.37E+05 |
| UBAL2_8049G0028 | 8.63E+05 | 7.30E+05 | 9.57E+05 |
| UBAL2_8049G0034 | 9.90E+05 | 1.01E+06 | 1.38E+06 |
| UBAL2_8049G0047 | 6.34E+05 | 6.28E+05 | 1.00E+06 |
| UBAL2_8049G0051 | 3.83E+06 | 3.66E+06 | 4.22E+06 |
| UBAL2_8049G0065 | 1.23E+07 | 1.16E+07 | 1.08E+07 |
| UBAL2_8049G0070 | 2.63E+06 | 2.78E+06 | 4.07E+06 |
| UBAL2_8049G0071 | 3.89E+06 | 4.34E+06 | 8.00E+06 |
| UBAL2_8049G0077 | 4.85E+06 | 3.53E+06 | 3.06E+06 |
| UBAL2_8049G0087 | 2.48E+06 | 3.18E+06 | 6.53E+06 |
| UBAL2_8049G0099 | 2.01E+06 | 2.64E+06 | 4.76E+06 |
| UBAL2_8049G0366 | 1.53E+06 | 1.59E+06 | 3.58E+06 |
| UBAL2_8049G0395 | 1.11E+06 | 1.16E+06 | 2.89E+06 |
| UBAL2_8062G0006 | 3.34E+05 | 3.53E+05 | 7.93E+05 |
| UBAL2_8062G0010 | 4.68E+05 | 5.54E+05 | 8.31E+05 |
| UBAL2_8062G0017 | 1.48E+06 | 1.47E+06 | 1.88E+06 |
| UBAL2_8062G0020 | 2.24E+06 | 2.31E+06 | 4.82E+06 |
| UBAL2_8062G0038 | 2.09E+07 | 2.59E+07 | 7.22E+07 |
| UBAL2_8062G0072 | 1.97E+07 | 2.34E+07 | 5.05E+07 |
| UBAL2_8062G0114 | 1.23E+06 | 1.36E+06 | 2.09E+06 |
| UBAL2_8062G0149 | 8.04E+06 | 9.83E+06 | 1.92E+07 |
| UBAL2_8062G0152 | 7.17E+06 | 6.46E+06 | 7.45E+06 |
| UBAL2_8062G0157 | 3.76E+06 | 3.99E+06 | 6.95E+06 |
| UBAL2_8062G0158 | 9.84E+06 | 8.97E+06 | 7.46E+06 |
| UBAL2_8062G0172 | 2.60E+06 | 4.46E+06 | 1.09E+07 |
| UBAL2_8062G0194 | 2.28E+07 | 3.40E+07 | 8.65E+07 |
| UBAL2_8062G0197 | 1.41E+06 | 1.82E+06 | 3.22E+06 |
| UBAL2_8062G0198 | 4.33E+06 | 4.02E+06 | 4.74E+06 |
| UBAL2_8062G0199 | 3.18E+05 | 3.33E+05 | 3.19E+05 |
| UBAL2_8062G0202 | 1.98E+07 | 2.58E+07 | 5.42E+07 |
| UBAL2_8062G0218 | 2.45E+06 | 3.02E+06 | 6.21E+06 |
| UBAL2_8062G0219 | 6.38E+06 | 8.78E+06 | 2.46E+07 |
| UBAL2_8062G0225 | 1.36E+06 | 1.62E+06 | 2.71E+06 |
| UBAL2_8062G0230 | 1.99E+06 | 2.09E+06 | 2.68E+06 |
| UBAL2_8062G0236 | 8.61E+05 | 9.88E+05 | 1.76E+06 |
| UBAL2_8062G0244 | 7.79E+06 | 1.26E+07 | 2.56E+07 |
| UBAL2_8062G0247 | 1.95E+06 | 2.03E+06 | 2.73E+06 |

|                 |          |          |          |
|-----------------|----------|----------|----------|
| UBAL2_8135G0009 | 3.30E+06 | 5.18E+06 | 8.52E+06 |
| UBAL2_8135G0020 | 1.05E+06 | 1.05E+06 | 1.44E+06 |
| UBAL2_8135G0042 | 1.26E+06 | 1.37E+06 | 1.83E+06 |
| UBAL2_8135G0062 | 3.87E+06 | 4.76E+06 | 9.17E+06 |
| UBAL2_8135G0082 | 9.72E+05 | 1.19E+06 | 2.26E+06 |
| UBAL2_8135G0083 | 1.48E+06 | 1.44E+06 | 2.79E+06 |
| UBAL2_8135G0092 | 1.24E+06 | 1.09E+06 | 1.30E+06 |
| UBAL2_8135G0101 | 2.06E+06 | 2.26E+06 | 3.95E+06 |
| UBAL2_8135G0106 | 2.05E+07 | 2.71E+07 | 4.87E+07 |
| UBAL2_8241G0006 | 3.83E+06 | 4.39E+06 | 6.23E+06 |
| UBAL2_8241G0010 | 1.60E+06 | 1.59E+06 | 2.17E+06 |
| UBAL2_8241G0076 | 3.58E+06 | 4.49E+06 | 2.17E+07 |
| UBAL2_8241G0077 | 1.20E+06 | 1.42E+06 | 3.10E+06 |
| UBAL2_8241G0084 | 1.99E+06 | 2.05E+06 | 3.35E+06 |
| UBAL2_8241G0089 | 6.88E+05 | 6.59E+05 | 6.58E+05 |
| UBAL2_8241G0092 | 5.23E+05 | 5.22E+05 | 1.47E+06 |
| UBAL2_8241G0149 | 6.48E+07 | 6.48E+07 | 2.27E+07 |
| UBAL2_8241G0182 | 1.07E+06 | 1.20E+06 | 5.19E+06 |
| UBAL2_8241G0196 | 2.00E+06 | 1.72E+06 | 5.57E+06 |
| UBAL2_8241G0229 | 1.98E+06 | 2.06E+06 | 2.65E+06 |
| UBAL2_8241G0230 | 1.24E+06 | 2.10E+06 | 5.50E+06 |
| UBAL2_8241G0232 | 1.57E+06 | 1.68E+06 | 3.27E+06 |
| UBAL2_8241G0235 | 1.21E+04 | 1.05E+04 | 1.18E+04 |
| UBAL2_8241G0247 | 1.16E+07 | 1.55E+07 | 3.87E+07 |
| UBAL2_8241G0264 | 3.94E+05 | 3.82E+05 | 3.25E+05 |
| UBAL2_8241G0281 | 2.22E+06 | 2.98E+06 | 1.11E+07 |
| UBAL2_8241G0297 | 1.51E+07 | 1.95E+07 | 3.53E+07 |
| UBAL2_8241G0302 | 2.18E+05 | 2.25E+05 | 4.37E+05 |
| UBAL2_8241G0315 | 4.87E+05 | 4.24E+05 | 6.43E+05 |
| UBAL2_8241G0330 | 5.41E+06 | 6.44E+06 | 1.48E+07 |
| UBAL2_8241G0339 | 1.31E+06 | 1.75E+06 | 3.96E+06 |
| UBAL2_8241G0346 | 7.21E+06 | 8.32E+06 | 1.62E+07 |
| UBAL2_8241G0348 | 7.64E+05 | 8.94E+05 | 2.35E+06 |
| UBAL2_8241G0349 | 8.35E+06 | 1.20E+07 | 3.40E+07 |
| UBAL2_8241G0356 | 4.05E+06 | 7.39E+06 | 1.82E+07 |
| UBAL2_8241G0357 | 4.10E+06 | 3.92E+06 | 4.95E+06 |
| UBAL2_8241G0358 | 2.41E+06 | 2.75E+06 | 4.76E+06 |
| UBAL2_8241G0374 | 4.33E+06 | 4.71E+06 | 8.10E+06 |
| UBAL2_8241G0378 | 1.16E+06 | 1.07E+06 | 1.80E+06 |
| UBAL2_8241G0383 | 3.14E+06 | 3.35E+06 | 4.25E+06 |
| UBAL2_8241G0386 | 2.90E+06 | 3.13E+06 | 6.67E+06 |
| UBAL2_8241G0391 | 2.80E+05 | 5.74E+05 | 1.56E+06 |
| UBAL2_8241G0395 | 2.43E+07 | 2.87E+07 | 5.51E+07 |
| UBAL2_8241G0452 | 1.33E+06 | 1.76E+06 | 3.98E+06 |
| UBAL2_8241G0455 | 2.83E+06 | 2.86E+06 | 3.78E+06 |
| UBAL2_8241G0456 | 1.25E+06 | 2.13E+06 | 4.32E+06 |
| UBAL2_8241G0467 | 1.79E+06 | 1.97E+06 | 3.53E+06 |
| UBAL2_8241G0488 | 2.24E+06 | 2.07E+06 | 1.67E+06 |
| UBAL2_8241G0495 | 8.23E+05 | 1.16E+06 | 1.88E+06 |
| UBAL2_8241G0507 | 6.28E+06 | 7.77E+06 | 1.78E+07 |
| UBAL2_8241G0512 | 2.68E+06 | 2.44E+06 | 3.30E+06 |
| UBAL2_8241G0516 | 1.86E+06 | 1.94E+06 | 3.73E+06 |
| UBAL2_8241G0527 | 1.32E+06 | 1.28E+06 | 2.13E+06 |
| UBAL2_8241G0531 | 1.87E+07 | 2.42E+07 | 6.86E+07 |
| UBAL2_8241G0536 | 8.64E+05 | 7.76E+05 | 5.66E+05 |
| UBAL2_8241G0537 | 6.91E+06 | 1.51E+07 | 3.28E+07 |
| UBAL2_8241G0543 | 9.77E+06 | 1.48E+07 | 3.96E+07 |

|                   |          |          |          |
|-------------------|----------|----------|----------|
| UBAL2_8241G0548   | 7.57E+06 | 1.39E+07 | 4.77E+07 |
| UBAL2_8241G0550   | 1.92E+06 | 1.53E+06 | 1.16E+06 |
| UBAL2_8241G0556   | 2.52E+06 | 2.36E+06 | 3.48E+06 |
| UBAL2_8241G0557   | 9.94E+06 | 1.18E+07 | 2.34E+07 |
| UBAL2_8241G0559   | 3.14E+06 | 4.02E+06 | 7.86E+06 |
| UBAL2_8241G0561   | 5.83E+05 | 5.43E+05 | 6.78E+05 |
| UBAL2_8241G0563   | 9.96E+06 | 1.30E+07 | 2.79E+07 |
| UBAL2_8241G0564   | 6.86E+05 | 7.40E+05 | 1.43E+06 |
| UBAL2_8241G0567   | 1.18E+07 | 1.69E+07 | 4.54E+07 |
| UBAL2_8241G0570   | 5.54E+06 | 7.77E+06 | 2.44E+07 |
| UBAL2_8241G0573   | 3.72E+06 | 4.74E+06 | 7.82E+06 |
| UBAL2_8241G0588   | 6.49E+05 | 8.50E+05 | 2.68E+06 |
| UBAL2_8241G0597   | 3.98E+05 | 5.84E+05 | 1.08E+06 |
| UBAL2_8241G0599   | 4.29E+06 | 5.74E+06 | 1.07E+07 |
| UBAL2_8241G0601   | 1.41E+06 | 2.66E+06 | 8.18E+06 |
| UBAL2_8241G0616   | 3.65E+06 | 4.74E+06 | 5.16E+06 |
| UBAL2_8241G0617   | 5.56E+06 | 7.17E+06 | 7.78E+06 |
| UBAL2_8241G0624   | 3.68E+06 | 4.90E+06 | 1.23E+07 |
| UBAL2_8241G0631   | 7.31E+06 | 7.74E+06 | 1.10E+07 |
| UBAL2_8241G0633   | 7.85E+05 | 9.76E+05 | 2.00E+06 |
| UBAL2_8241G0637   | 1.51E+06 | 1.76E+06 | 3.01E+06 |
| UBAL2_8241G0652   | 6.93E+06 | 8.49E+06 | 1.14E+07 |
| UBAL2_8524G0005   | 3.64E+06 | 4.77E+06 | 9.84E+06 |
| UBAL2_8524G0090   | 5.75E+05 | 8.27E+05 | 1.63E+06 |
| UBAL2_8524G0099   | 4.57E+06 | 6.41E+06 | 1.12E+07 |
| UBAL2_8524G0108   | 3.05E+07 | 5.91E+07 | 2.02E+08 |
| UBAL2_8524G0121   | 4.17E+06 | 4.40E+06 | 9.43E+06 |
| UBAL2_8524G0131   | 2.70E+06 | 2.83E+06 | 5.00E+06 |
| UBAL2_8524G0133   | 3.43E+05 | 2.91E+05 | 2.80E+05 |
| UBAL2_8524G0177   | 5.73E+06 | 7.51E+06 | 1.26E+07 |
| UBAL2_8524G0178   | 2.34E+06 | 2.28E+06 | 3.84E+06 |
| UBAL2_8524G0187   | 1.32E+06 | 1.69E+06 | 3.90E+06 |
| UBAL2_8524G0188   | 3.81E+05 | 4.81E+05 | 1.47E+06 |
| UBAL2_8524G0214   | 3.67E+05 | 4.78E+05 | 7.05E+05 |
| UBAL2_8524G0217   | 2.06E+06 | 2.14E+06 | 4.19E+06 |
| UBAL2_8524G0222   | 1.83E+06 | 2.16E+06 | 3.71E+06 |
| UBAL2_8524G0237   | 1.16E+07 | 1.40E+07 | 1.81E+07 |
| UBAL2_8524G0238   | 6.39E+06 | 7.73E+06 | 1.29E+07 |
| UBAL2_8524G0241   | 2.17E+06 | 2.73E+06 | 5.01E+06 |
| UBAL2_8524G0249   | 4.21E+06 | 4.68E+06 | 6.35E+06 |
| UBAL2_8692G0012   | 3.00E+06 | 4.04E+06 | 7.79E+06 |
| UBAL2_8692G0019   | 1.25E+06 | 1.20E+06 | 1.98E+06 |
| UBAL2_8692G0024.1 | 2.77E+04 | 2.55E+04 | 2.08E+04 |
| UBAL2_8692G0034   | 1.67E+06 | 2.14E+06 | 5.34E+06 |
| UBAL2_8692G0038   | 5.46E+06 | 6.63E+06 | 1.87E+07 |
| UBAL2_8692G0040   | 1.69E+06 | 1.68E+06 | 3.06E+06 |
| UBAL2_8692G0045   | 5.28E+04 | 4.75E+04 | 4.66E+04 |
| UBAL2_8692G0047   | 4.18E+06 | 5.36E+06 | 6.47E+06 |
| UBAL2_8692G0055   | 1.06E+06 | 1.15E+06 | 1.69E+06 |
| UBAL2_8692G0062   | 1.23E+06 | 1.22E+06 | 2.64E+06 |
| UBAL2_8692G0072   | 7.73E+05 | 1.35E+06 | 2.79E+06 |
| UBAL2_8692G0088   | 2.57E+07 | 2.80E+07 | 5.03E+07 |
| UBAL2_8692G0096   | 3.45E+06 | 5.26E+06 | 9.85E+06 |
| UBAL2_8692G0099   | 7.99E+06 | 8.23E+06 | 9.42E+06 |
| UBAL2_8692G0110   | 4.92E+06 | 5.16E+06 | 8.57E+06 |
| UBAL2_8692G0111   | 2.40E+06 | 2.28E+06 | 2.64E+06 |
| UBAL2_8692G0114   | 5.17E+07 | 8.59E+07 | 2.50E+08 |

|                 |          |          |          |
|-----------------|----------|----------|----------|
| UBAL2_8692G0115 | 3.03E+06 | 3.53E+06 | 6.16E+06 |
| UBAL2_8692G0117 | 1.59E+07 | 1.64E+07 | 3.40E+07 |
| UBAL2_8692G0119 | 2.52E+07 | 3.19E+07 | 7.17E+07 |
| UBAL2_8692G0120 | 3.04E+06 | 3.26E+06 | 1.08E+07 |
| UBAL2_8692G0121 | 3.74E+07 | 5.66E+07 | 1.52E+08 |
| UBAL2_8692G0128 | 4.38E+07 | 6.33E+07 | 1.66E+08 |
| UBAL2_8692G0139 | 5.44E+06 | 7.01E+06 | 1.63E+07 |
| UBAL2_8692G0151 | 8.85E+06 | 1.21E+07 | 2.72E+07 |
| UBAL2_8692G0153 | 6.63E+04 | 5.96E+04 | 6.27E+04 |
| UBAL2_8692G0154 | 4.02E+07 | 4.98E+07 | 9.13E+07 |
| UBAL2_8692G0155 | 8.85E+06 | 1.11E+07 | 2.15E+07 |
| UBAL2_8692G0156 | 2.27E+06 | 2.11E+06 | 2.05E+06 |
| UBAL2_8692G0157 | 3.80E+06 | 4.77E+06 | 7.23E+06 |
| UBAL2_8692G0176 | 2.69E+06 | 2.69E+06 | 4.90E+06 |
| UBAL3_2406G0030 | 1.14E+07 | 1.11E+07 | 1.00E+07 |
| UBAL3_2406G0037 | 8.08E+06 | 8.14E+06 | 7.07E+06 |
| UBAL3_2406G0040 | 1.13E+07 | 1.04E+07 | 7.58E+06 |
| UBAL3_2406G0041 | 7.75E+06 | 7.15E+06 | 5.85E+06 |
| UBAL3_2406G0043 | 2.33E+06 | 1.75E+06 | 1.62E+06 |
| UBAL3_2406G0045 | 4.00E+06 | 3.80E+06 | 3.43E+06 |
| UBAL3_2406G0051 | 7.15E+07 | 6.72E+07 | 4.34E+07 |
| UBAL3_2406G0053 | 1.05E+06 | 9.70E+05 | 9.90E+05 |
| UBAL3_2406G0054 | 3.80E+07 | 3.41E+07 | 2.92E+07 |
| UBAL3_2406G0057 | 3.37E+06 | 2.99E+06 | 2.25E+06 |
| UBAL3_2406G0058 | 1.85E+06 | 1.56E+06 | 1.13E+06 |
| UBAL3_4481G0069 | 2.63E+06 | 2.26E+06 | 2.21E+06 |
| UBAL3_4481G0073 | 1.40E+06 | 1.24E+06 | 1.30E+06 |
| UBAL3_4481G0081 | 1.58E+07 | 1.44E+07 | 1.14E+07 |
| UBAL3_4481G0082 | 3.14E+06 | 3.05E+06 | 2.21E+06 |
| UBAL3_4481G0084 | 3.33E+06 | 3.23E+06 | 2.78E+06 |
| UBAL3_4481G0086 | 2.20E+07 | 2.11E+07 | 1.56E+07 |
| UBAL3_4481G0087 | 1.23E+08 | 1.19E+08 | 9.15E+07 |
| UBAL3_4481G0088 | 1.21E+07 | 1.14E+07 | 9.37E+06 |
| UBAL3_4481G0089 | 3.65E+06 | 3.60E+06 | 3.14E+06 |
| UBAL3_4481G0092 | 1.28E+08 | 1.24E+08 | 9.42E+07 |
| UBAL3_4481G0095 | 2.20E+07 | 1.92E+07 | 1.43E+07 |
| UBAL3_4481G0100 | 5.54E+06 | 5.03E+06 | 4.48E+06 |
| UBAL3_4481G0101 | 2.15E+06 | 2.02E+06 | 1.55E+06 |
| UBAL3_4481G0104 | 1.55E+07 | 1.62E+07 | 1.37E+07 |
| UBAL3_4481G0105 | 3.42E+07 | 3.31E+07 | 2.70E+07 |
| UBAL3_4481G0108 | 3.67E+06 | 3.00E+06 | 2.60E+06 |
| UBAL3_4481G0111 | 2.47E+07 | 2.24E+07 | 1.95E+07 |
| UBAL3_4481G0112 | 8.28E+05 | 7.61E+05 | 7.90E+05 |
| UBAL3_4481G0116 | 2.29E+06 | 2.05E+06 | 1.56E+06 |
| UBAL3_4481G0117 | 3.20E+07 | 2.64E+07 | 2.34E+07 |
| UBAL3_4481G0118 | 3.37E+09 | 4.32E+09 | 5.79E+09 |
| UBAL3_4481G0119 | 6.94E+08 | 7.80E+08 | 8.64E+08 |
| UBAL3_4866G0049 | 2.04E+07 | 1.66E+07 | 1.41E+07 |
| UBAL3_4866G0050 | 2.70E+06 | 2.50E+06 | 2.02E+06 |
| UBAL3_4866G0054 | 1.13E+06 | 1.10E+06 | 9.99E+05 |
| UBAL3_4866G0056 | 6.61E+07 | 6.26E+07 | 3.97E+07 |
| UBAL3_4866G0057 | 3.16E+08 | 3.24E+08 | 2.23E+08 |
| UBAL3_4866G0058 | 3.98E+07 | 3.67E+07 | 3.36E+07 |
| UBAL3_4866G0059 | 1.02E+08 | 1.01E+08 | 8.94E+07 |
| UBAL3_4866G0062 | 2.25E+07 | 2.11E+07 | 1.85E+07 |
| UBAL3_4866G0064 | 8.82E+06 | 8.18E+06 | 5.58E+06 |
| UBAL3_5748G0002 | 2.25E+06 | 2.15E+06 | 2.14E+06 |

|                   |          |          |          |
|-------------------|----------|----------|----------|
| UBAL3_5748G0003   | 1.24E+07 | 1.16E+07 | 1.05E+07 |
| UBAL3_5748G0004   | 9.88E+06 | 9.11E+06 | 7.73E+06 |
| UBAL3_5748G0005   | 2.07E+07 | 1.99E+07 | 1.79E+07 |
| UBAL3_5748G0006   | 1.91E+07 | 1.83E+07 | 1.54E+07 |
| UBAL3_5748G0007   | 5.38E+06 | 5.26E+06 | 4.84E+06 |
| UBAL3_5748G0008   | 5.43E+07 | 5.38E+07 | 4.38E+07 |
| UBAL3_5748G0009   | 1.28E+08 | 1.26E+08 | 1.01E+08 |
| UBAL3_5748G0010   | 2.73E+07 | 2.26E+07 | 1.65E+07 |
| UBAL3_5748G0012   | 1.29E+08 | 1.14E+08 | 9.00E+07 |
| UBAL3_5748G0014   | 6.48E+06 | 6.33E+06 | 6.96E+06 |
| UBAL3_5748G0015   | 8.28E+05 | 7.30E+05 | 6.07E+05 |
| UBAL3_5748G0020   | 4.73E+06 | 4.49E+06 | 4.04E+06 |
| UBAL3_5748G0022   | 6.78E+06 | 6.98E+06 | 6.23E+06 |
| UBAL3_5784G0025.1 | 1.42E+07 | 1.34E+07 | 1.23E+07 |
| UBAL3_6050G0008   | 2.25E+06 | 2.12E+06 | 1.57E+06 |
| UBAL3_6050G0010   | 3.71E+08 | 3.61E+08 | 2.84E+08 |
| UBAL3_6050G0011   | 7.57E+07 | 7.54E+07 | 4.89E+07 |
| UBAL3_6050G0012   | 1.28E+07 | 1.14E+07 | 8.04E+06 |
| UBAL3_6050G0013   | 5.51E+07 | 5.05E+07 | 4.49E+07 |
| UBAL3_6050G0014   | 2.28E+07 | 2.11E+07 | 2.00E+07 |
| UBAL3_6050G0015   | 1.05E+07 | 1.01E+07 | 7.62E+06 |
| UBAL3_6050G0017   | 1.00E+08 | 1.02E+08 | 9.04E+07 |
| UBAL3_6050G0019   | 2.69E+07 | 2.81E+07 | 2.54E+07 |
| UBAL3_6050G0022   | 2.50E+07 | 2.33E+07 | 2.33E+07 |
| UBAL3_6050G0023   | 3.55E+07 | 3.38E+07 | 2.71E+07 |
| UBAL3_6050G0027   | 1.96E+07 | 1.84E+07 | 1.33E+07 |
| UBAL3_6050G0037   | 2.30E+06 | 2.22E+06 | 1.82E+06 |
| UBAL3_6050G0039   | 1.69E+08 | 1.68E+08 | 1.83E+08 |
| UBAL3_6948G0005   | 2.09E+08 | 1.73E+08 | 1.24E+08 |
| UBAL3_6948G0011   | 1.88E+07 | 1.66E+07 | 1.41E+07 |
| UBAL3_6948G0012   | 7.30E+07 | 7.07E+07 | 5.93E+07 |
| UBAL3_6948G0013   | 2.21E+06 | 2.00E+06 | 1.98E+06 |
| UBAL3_6948G0014   | 1.12E+07 | 1.06E+07 | 1.23E+07 |
| UBAL3_6948G0016   | 9.23E+07 | 8.30E+07 | 6.18E+07 |
| UBAL3_6948G0017   | 1.15E+07 | 1.05E+07 | 6.78E+06 |
| UBAL3_6948G0020   | 1.06E+08 | 7.05E+07 | 4.83E+07 |
| UBAL3_6948G0022   | 8.48E+07 | 7.94E+07 | 5.63E+07 |
| UBAL3_6948G0023   | 4.21E+07 | 3.45E+07 | 2.24E+07 |
| UBAL3_6948G0028   | 4.96E+07 | 4.40E+07 | 3.32E+07 |
| UBAL3_6948G0029   | 8.63E+06 | 8.75E+06 | 7.24E+06 |
| UBAL3_6948G0030   | 1.34E+06 | 1.26E+06 | 9.70E+05 |
| UBAL3_6948G0037   | 2.88E+08 | 2.53E+08 | 2.02E+08 |
| UBAL3_6948G0038   | 7.64E+07 | 6.66E+07 | 5.74E+07 |
| UBAL3_6948G0039   | 2.45E+08 | 2.19E+08 | 1.65E+08 |
| UBAL3_6948G0044   | 2.42E+06 | 2.07E+06 | 1.78E+06 |
| UBAL3_6948G0045   | 2.32E+07 | 2.25E+07 | 3.17E+07 |
| UBAL3_7442G0013   | 1.68E+08 | 1.30E+08 | 1.34E+08 |
| UBAL3_7442G0017   | 6.41E+06 | 6.75E+06 | 8.92E+06 |
| UBAL3_7442G0019   | 4.57E+06 | 4.35E+06 | 3.51E+06 |
| UBAL3_7442G0020   | 7.48E+06 | 7.00E+06 | 5.76E+06 |
| UBAL3_7442G0022   | 2.31E+08 | 2.15E+08 | 1.39E+08 |
| UBAL3_7442G0024   | 4.97E+08 | 5.23E+08 | 4.60E+08 |
| UBAL3_7442G0026.1 | 3.16E+06 | 2.58E+06 | 1.65E+06 |
| UBAL3_7442G0028   | 1.55E+07 | 1.65E+07 | 1.26E+07 |
| UBAL3_7442G0029   | 3.53E+06 | 5.00E+06 | 4.16E+06 |
| UBAL3_7442G0030   | 2.82E+07 | 2.14E+07 | 1.59E+07 |
| UBAL3_7442G0034   | 1.38E+08 | 1.34E+08 | 9.58E+07 |

|                 |          |          |          |
|-----------------|----------|----------|----------|
| UBAL3_7442G0037 | 2.09E+07 | 1.84E+07 | 1.35E+07 |
| UBAL3_7442G0038 | 2.26E+07 | 2.05E+07 | 1.68E+07 |
| UBAL3_7442G0039 | 8.11E+06 | 7.05E+06 | 6.28E+06 |
| UBAL3_7442G0042 | 2.65E+07 | 2.48E+07 | 1.82E+07 |
| UBAL3_7442G0043 | 4.67E+07 | 4.35E+07 | 3.71E+07 |
| UBAL3_7442G0051 | 3.44E+06 | 3.21E+06 | 2.61E+06 |
| UBAL3_7442G0055 | 3.78E+07 | 2.85E+07 | 1.88E+07 |
| UBAL3_7442G0057 | 5.76E+07 | 5.53E+07 | 4.30E+07 |
| UBAL3_7442G0058 | 3.50E+06 | 3.46E+06 | 3.24E+06 |
| UBAL3_7442G0063 | 1.28E+08 | 1.17E+08 | 8.22E+07 |
| UBAL3_7442G0065 | 1.64E+07 | 1.64E+07 | 1.29E+07 |
| UBAL3_7442G0066 | 1.82E+06 | 1.80E+06 | 1.98E+06 |
| UBAL3_7442G0072 | 4.50E+07 | 4.06E+07 | 3.24E+07 |
| UBAL3_7442G0073 | 1.43E+07 | 1.34E+07 | 1.06E+07 |
| UBAL3_7442G0078 | 3.42E+07 | 2.95E+07 | 3.61E+07 |
| UBAL3_7442G0080 | 9.25E+06 | 8.85E+06 | 6.96E+06 |
| UBAL3_7442G0081 | 5.31E+07 | 5.04E+07 | 2.33E+07 |
| UBAL3_7442G0089 | 2.58E+07 | 2.58E+07 | 2.33E+07 |
| UBAL3_7822G0001 | 5.87E+08 | 5.79E+08 | 4.05E+08 |
| UBAL3_7822G0004 | 3.91E+07 | 3.70E+07 | 3.01E+07 |
| UBAL3_7822G0008 | 1.39E+07 | 1.22E+07 | 1.05E+07 |
| UBAL3_7892G0007 | 6.01E+07 | 5.44E+07 | 4.40E+07 |
| UBAL3_7892G0008 | 7.31E+07 | 7.04E+07 | 5.60E+07 |
| UBAL3_7892G0012 | 6.84E+07 | 5.97E+07 | 4.34E+07 |
| UBAL3_7892G0020 | 3.99E+07 | 3.13E+07 | 2.53E+07 |
| UBAL3_7892G0024 | 5.53E+07 | 5.21E+07 | 4.96E+07 |
| UBAL3_7892G0027 | 4.73E+06 | 4.61E+06 | 3.28E+06 |
| UBAL3_7892G0042 | 5.72E+06 | 5.77E+06 | 5.08E+06 |
| UBAL3_7892G0056 | 8.89E+06 | 8.60E+06 | 8.54E+06 |
| UBAL3_7892G0057 | 1.54E+07 | 1.46E+07 | 1.34E+07 |
| UBAL3_7892G0058 | 2.65E+07 | 2.71E+07 | 3.10E+07 |
| UBAL3_7892G0059 | 5.15E+08 | 5.00E+08 | 5.52E+08 |
| UBAL3_7892G0060 | 2.93E+07 | 3.19E+07 | 3.54E+07 |
| UBAL3_7892G0061 | 4.67E+06 | 4.94E+06 | 4.69E+06 |
| UBAL3_7892G0118 | 8.18E+06 | 7.61E+06 | 6.33E+06 |
| UBAL3_7892G0121 | 1.50E+06 | 1.32E+06 | 1.19E+06 |
| UBAL3_7892G0122 | 1.53E+08 | 1.34E+08 | 8.91E+07 |
| UBAL3_7916G0004 | 4.25E+06 | 4.37E+06 | 3.98E+06 |
| UBAL3_7916G0007 | 9.06E+06 | 8.09E+06 | 5.95E+06 |
| UBAL3_7916G0009 | 9.66E+06 | 9.27E+06 | 7.48E+06 |
| UBAL3_7916G0010 | 2.52E+06 | 2.14E+06 | 1.95E+06 |
| UBAL3_7916G0012 | 5.74E+06 | 5.54E+06 | 4.45E+06 |
| UBAL3_7916G0017 | 9.03E+06 | 9.73E+06 | 8.85E+06 |
| UBAL3_7916G0018 | 7.95E+06 | 7.88E+06 | 6.91E+06 |
| UBAL3_7916G0019 | 4.49E+06 | 3.96E+06 | 3.12E+06 |
| UBAL3_7916G0020 | 1.12E+07 | 1.05E+07 | 8.60E+06 |
| UBAL3_7916G0022 | 1.52E+08 | 1.57E+08 | 1.47E+08 |
| UBAL3_7916G0030 | 1.06E+07 | 9.51E+06 | 9.36E+06 |
| UBAL3_7916G0032 | 3.78E+07 | 3.62E+07 | 3.58E+07 |
| UBAL3_7916G0035 | 1.22E+06 | 9.67E+05 | 6.26E+05 |
| UBAL3_7916G0037 | 1.04E+07 | 1.01E+07 | 1.42E+07 |
| UBAL3_7932G0003 | 1.41E+06 | 1.27E+06 | 1.37E+06 |
| UBAL3_7932G0007 | 1.58E+08 | 1.48E+08 | 1.50E+08 |
| UBAL3_7932G0008 | 7.11E+07 | 6.89E+07 | 5.32E+07 |
| UBAL3_7932G0009 | 1.03E+07 | 1.02E+07 | 9.12E+06 |
| UBAL3_7932G0010 | 1.00E+06 | 9.73E+05 | 8.18E+05 |
| UBAL3_7932G0011 | 1.01E+08 | 9.89E+07 | 1.01E+08 |

|                 |          |          |          |
|-----------------|----------|----------|----------|
| UBAL3_7932G0015 | 5.42E+06 | 5.03E+06 | 4.81E+06 |
| UBAL3_7932G0020 | 1.55E+07 | 1.41E+07 | 1.23E+07 |
| UBAL3_7952G0006 | 7.52E+06 | 7.63E+06 | 5.35E+06 |
| UBAL3_7952G0007 | 1.22E+08 | 1.15E+08 | 8.60E+07 |
| UBAL3_7952G0009 | 6.08E+05 | 5.54E+05 | 4.95E+05 |
| UBAL3_7952G0011 | 1.82E+07 | 1.86E+07 | 1.68E+07 |
| UBAL3_7952G0018 | 6.95E+06 | 6.73E+06 | 5.70E+06 |
| UBAL3_7952G0023 | 1.26E+06 | 1.11E+06 | 8.91E+05 |
| UBAL3_7952G0026 | 1.29E+07 | 1.24E+07 | 9.62E+06 |
| UBAL3_7952G0028 | 2.16E+06 | 2.10E+06 | 2.09E+06 |
| UBAL3_7952G0029 | 6.26E+06 | 5.58E+06 | 4.75E+06 |
| UBAL3_7952G0031 | 1.35E+07 | 1.27E+07 | 9.93E+06 |
| UBAL3_7952G0032 | 6.53E+06 | 6.48E+06 | 6.49E+06 |
| UBAL3_7952G0037 | 1.62E+07 | 1.58E+07 | 1.09E+07 |
| UBAL3_7952G0038 | 1.25E+08 | 1.17E+08 | 8.35E+07 |
| UBAL3_7952G0039 | 4.08E+08 | 3.90E+08 | 2.46E+08 |
| UBAL3_7952G0040 | 3.29E+08 | 3.22E+08 | 2.42E+08 |
| UBAL3_7952G0041 | 1.17E+07 | 1.20E+07 | 8.44E+06 |
| UBAL3_7952G0051 | 5.08E+07 | 4.75E+07 | 3.63E+07 |
| UBAL3_7952G0057 | 6.72E+06 | 5.66E+06 | 4.80E+06 |
| UBAL3_7952G0060 | 8.27E+06 | 7.96E+06 | 7.45E+06 |
| UBAL3_7952G0062 | 4.30E+06 | 4.00E+06 | 3.56E+06 |
| UBAL3_7952G0066 | 8.57E+07 | 5.86E+07 | 4.02E+07 |
| UBAL3_7952G0067 | 9.50E+06 | 9.15E+06 | 7.39E+06 |
| UBAL3_7952G0068 | 3.62E+06 | 3.36E+06 | 2.68E+06 |
| UBAL3_7952G0069 | 3.34E+07 | 3.11E+07 | 2.43E+07 |
| UBAL3_7952G0070 | 4.92E+07 | 4.40E+07 | 3.68E+07 |
| UBAL3_7952G0072 | 2.50E+08 | 1.81E+08 | 2.49E+08 |
| UBAL3_7980G0001 | 1.92E+08 | 1.54E+08 | 9.45E+07 |
| UBAL3_7980G0003 | 4.37E+07 | 3.89E+07 | 3.36E+07 |
| UBAL3_7980G0004 | 1.65E+07 | 1.06E+07 | 7.17E+06 |
| UBAL3_7980G0005 | 5.79E+05 | 5.16E+05 | 4.23E+05 |
| UBAL3_7980G0006 | 4.47E+06 | 3.49E+06 | 2.32E+06 |
| UBAL3_7980G0007 | 4.01E+06 | 4.03E+06 | 2.86E+06 |
| UBAL3_7980G0008 | 7.58E+06 | 7.65E+06 | 6.43E+06 |
| UBAL3_8015G0001 | 6.41E+08 | 5.71E+08 | 4.16E+08 |
| UBAL3_8015G0002 | 5.40E+08 | 5.00E+08 | 3.89E+08 |
| UBAL3_8015G0003 | 5.05E+08 | 4.31E+08 | 3.67E+08 |
| UBAL3_8015G0004 | 4.08E+08 | 3.58E+08 | 2.42E+08 |
| UBAL3_8015G0005 | 1.00E+08 | 8.95E+07 | 5.59E+07 |
| UBAL3_8015G0006 | 1.28E+07 | 1.11E+07 | 9.57E+06 |
| UBAL3_8015G0007 | 1.88E+07 | 1.75E+07 | 1.46E+07 |
| UBAL3_8015G0011 | 4.09E+06 | 3.27E+06 | 2.12E+06 |
| UBAL3_8015G0012 | 1.31E+06 | 1.14E+06 | 1.07E+06 |
| UBAL3_8015G0014 | 5.10E+07 | 4.97E+07 | 4.09E+07 |
| UBAL3_8015G0015 | 2.15E+07 | 2.08E+07 | 1.55E+07 |
| UBAL3_8029G0001 | 3.03E+08 | 2.48E+08 | 2.05E+08 |
| UBAL3_8029G0002 | 3.54E+06 | 3.27E+06 | 2.35E+06 |
| UBAL3_8029G0032 | 1.57E+06 | 1.58E+06 | 1.71E+06 |
| UBAL3_8029G0034 | 1.84E+07 | 1.84E+07 | 1.55E+07 |
| UBAL3_8029G0040 | 2.43E+05 | 2.04E+05 | 1.57E+05 |
| UBAL3_8029G0043 | 8.58E+07 | 7.70E+07 | 5.64E+07 |
| UBAL3_8029G0044 | 2.75E+05 | 2.59E+05 | 2.41E+05 |
| UBAL3_8029G0045 | 1.46E+07 | 1.40E+07 | 1.16E+07 |
| UBAL3_8029G0046 | 3.02E+06 | 3.00E+06 | 2.96E+06 |
| UBAL3_8029G0056 | 2.98E+06 | 2.65E+06 | 1.96E+06 |
| UBAL3_8029G0062 | 3.82E+07 | 3.44E+07 | 2.42E+07 |

|                 |          |          |          |
|-----------------|----------|----------|----------|
| UBAL3_8029G0065 | 3.02E+06 | 2.95E+06 | 2.23E+06 |
| UBAL3_8029G0066 | 4.24E+07 | 4.10E+07 | 3.42E+07 |
| UBAL3_8029G0068 | 8.54E+06 | 9.08E+06 | 6.88E+06 |
| UBAL3_8029G0070 | 1.42E+08 | 1.39E+08 | 1.02E+08 |
| UBAL3_8029G0071 | 6.21E+08 | 5.69E+08 | 4.00E+08 |
| UBAL3_8029G0072 | 1.00E+07 | 9.11E+06 | 8.20E+06 |
| UBAL3_8029G0073 | 1.41E+06 | 1.51E+06 | 1.37E+06 |
| UBAL3_8029G0075 | 5.32E+06 | 5.21E+06 | 5.04E+06 |
| UBAL3_8029G0076 | 3.02E+06 | 2.95E+06 | 2.45E+06 |
| UBAL3_8029G0077 | 2.41E+06 | 2.34E+06 | 2.13E+06 |
| UBAL3_8029G0081 | 4.46E+07 | 3.95E+07 | 2.97E+07 |
| UBAL3_8029G0082 | 5.30E+07 | 4.67E+07 | 3.55E+07 |
| UBAL3_8029G0083 | 7.96E+06 | 7.35E+06 | 7.39E+06 |
| UBAL3_8029G0084 | 7.08E+07 | 6.66E+07 | 5.38E+07 |
| UBAL3_8042G0001 | 5.44E+06 | 3.79E+06 | 6.60E+05 |
| UBAL3_8042G0002 | 1.91E+07 | 1.53E+07 | 1.05E+07 |
| UBAL3_8042G0003 | 3.92E+08 | 3.70E+08 | 2.63E+08 |
| UBAL3_8042G0005 | 3.84E+07 | 3.15E+07 | 2.00E+07 |
| UBAL3_8042G0006 | 1.73E+08 | 1.50E+08 | 9.69E+07 |
| UBAL3_8042G0007 | 1.62E+07 | 1.36E+07 | 9.99E+06 |
| UBAL3_8042G0008 | 3.91E+07 | 3.48E+07 | 2.28E+07 |
| UBAL3_8042G0009 | 6.97E+06 | 6.37E+06 | 5.17E+06 |
| UBAL3_8042G0010 | 1.68E+06 | 1.43E+06 | 9.52E+05 |
| UBAL3_8042G0011 | 2.02E+07 | 1.83E+07 | 1.47E+07 |
| UBAL3_8042G0012 | 5.40E+07 | 5.08E+07 | 3.69E+07 |
| UBAL3_8042G0013 | 1.16E+08 | 9.14E+07 | 5.98E+07 |
| UBAL3_8042G0014 | 2.57E+07 | 2.13E+07 | 1.38E+07 |
| UBAL3_8042G0018 | 1.27E+08 | 1.11E+08 | 8.42E+07 |
| UBAL3_8042G0020 | 1.69E+06 | 1.58E+06 | 1.67E+06 |
| UBAL3_8042G0021 | 3.94E+07 | 3.73E+07 | 2.53E+07 |
| UBAL3_8042G0022 | 3.62E+07 | 3.11E+07 | 1.93E+07 |
| UBAL3_8042G0023 | 2.35E+08 | 2.11E+08 | 1.60E+08 |
| UBAL3_8042G0025 | 8.14E+07 | 7.26E+07 | 5.13E+07 |
| UBAL3_8042G0027 | 9.43E+07 | 8.96E+07 | 7.20E+07 |
| UBAL3_8042G0028 | 3.99E+07 | 3.75E+07 | 3.56E+07 |
| UBAL3_8042G0031 | 9.41E+06 | 8.65E+06 | 6.28E+06 |
| UBAL3_8042G0032 | 1.35E+08 | 1.22E+08 | 7.55E+07 |
| UBAL3_8042G0033 | 4.03E+07 | 3.36E+07 | 2.17E+07 |
| UBAL3_8042G0034 | 1.49E+08 | 1.39E+08 | 1.08E+08 |
| UBAL3_8042G0035 | 4.68E+07 | 3.99E+07 | 2.72E+07 |
| UBAL3_8042G0037 | 4.28E+08 | 4.01E+08 | 3.38E+08 |
| UBAL3_8042G0043 | 4.41E+07 | 4.36E+07 | 3.63E+07 |
| UBAL3_8042G0045 | 3.07E+07 | 3.04E+07 | 2.76E+07 |
| UBAL3_8042G0046 | 6.97E+05 | 6.56E+05 | 6.56E+05 |
| UBAL3_8042G0048 | 5.55E+06 | 4.83E+06 | 3.99E+06 |
| UBAL3_8042G0052 | 6.41E+06 | 5.84E+06 | 4.38E+06 |
| UBAL3_8042G0055 | 2.27E+06 | 2.58E+06 | 3.29E+06 |
| UBAL3_8042G0057 | 1.91E+07 | 1.88E+07 | 1.59E+07 |
| UBAL3_8042G0058 | 7.86E+08 | 8.32E+08 | 7.32E+08 |
| UBAL3_8042G0059 | 2.25E+07 | 2.12E+07 | 2.02E+07 |
| UBAL3_8042G0060 | 6.47E+05 | 7.25E+05 | 6.32E+05 |
| UBAL3_8042G0068 | 1.59E+07 | 1.43E+07 | 1.25E+07 |
| UBAL3_8042G0070 | 2.12E+07 | 1.95E+07 | 1.54E+07 |
| UBAL3_8063G0002 | 1.29E+08 | 1.24E+08 | 9.78E+07 |
| UBAL3_8063G0004 | 3.50E+07 | 3.41E+07 | 2.96E+07 |
| UBAL3_8063G0007 | 3.08E+07 | 3.26E+07 | 2.48E+07 |
| UBAL3_8063G0008 | 1.43E+08 | 1.47E+08 | 1.32E+08 |



|                   |          |          |          |
|-------------------|----------|----------|----------|
| UBAL3_8063G0009   | 1.79E+08 | 1.92E+08 | 1.86E+08 |
| UBAL3_8063G0010   | 1.46E+08 | 1.23E+08 | 8.18E+07 |
| UBAL3_8063G0014   | 1.08E+07 | 1.02E+07 | 1.02E+07 |
| UBAL3_8063G0020   | 2.18E+06 | 2.07E+06 | 1.80E+06 |
| UBAL3_8063G0025   | 3.37E+07 | 2.67E+07 | 2.19E+07 |
| UBAL3_8063G0041   | 7.41E+06 | 6.24E+06 | 4.68E+06 |
| UBAL3_8063G0044   | 3.83E+06 | 3.25E+06 | 2.41E+06 |
| UBAL3_8063G0045   | 6.30E+06 | 5.86E+06 | 5.50E+06 |
| UBAL3_8063G0046   | 1.76E+08 | 1.59E+08 | 1.05E+08 |
| UBAL3_8063G0047   | 1.29E+08 | 1.17E+08 | 8.74E+07 |
| UBAL3_8063G0048   | 1.10E+07 | 9.85E+06 | 7.08E+06 |
| UBAL3_8063G0049   | 6.04E+06 | 5.55E+06 | 3.99E+06 |
| UBAL3_8063G0058   | 4.35E+06 | 4.59E+06 | 3.58E+06 |
| UBAL3_8063G0067   | 7.94E+06 | 7.99E+06 | 5.20E+06 |
| UBAL3_8063G0076   | 4.38E+06 | 4.34E+06 | 3.35E+06 |
| UBAL3_8063G0078   | 1.50E+07 | 1.45E+07 | 1.19E+07 |
| UBAL3_8063G0081   | 1.34E+07 | 1.16E+07 | 8.66E+06 |
| UBAL3_8063G0082   | 7.54E+05 | 7.40E+05 | 5.24E+05 |
| UBAL3_8063G0083   | 3.92E+06 | 3.71E+06 | 3.59E+06 |
| UBAL3_8063G0084   | 7.13E+06 | 6.70E+06 | 5.79E+06 |
| UBAL3_8063G0085   | 3.55E+07 | 3.10E+07 | 2.22E+07 |
| UBAL3_8063G0095   | 2.11E+06 | 1.77E+06 | 1.20E+06 |
| UBAL3_8063G0101   | 1.32E+08 | 1.36E+08 | 1.22E+08 |
| UBAL3_8063G0103   | 5.85E+06 | 5.94E+06 | 5.66E+06 |
| UBAL3_8063G0105.1 | 3.69E+06 | 3.63E+06 | 2.79E+06 |
| UBAL3_8270G0003   | 1.02E+07 | 9.58E+06 | 7.85E+06 |
| UBAL3_8270G0004   | 7.75E+06 | 7.43E+06 | 5.50E+06 |
| UBAL3_8270G0005   | 4.50E+07 | 4.25E+07 | 3.66E+07 |
| UBAL3_8270G0006   | 1.65E+07 | 1.57E+07 | 1.28E+07 |
| UBAL3_8270G0007   | 1.05E+08 | 1.06E+08 | 8.82E+07 |
| UBAL3_8270G0009   | 7.23E+07 | 6.50E+07 | 5.14E+07 |
| UBAL3_8270G0010   | 1.80E+07 | 1.82E+07 | 1.66E+07 |
| UBAL3_8270G0012   | 1.10E+08 | 1.08E+08 | 9.61E+07 |
| UBAL3_8270G0022   | 2.08E+07 | 1.96E+07 | 1.51E+07 |
| UBAL3_8270G0024   | 2.94E+07 | 2.53E+07 | 1.87E+07 |
| UBAL3_8270G0027   | 1.34E+07 | 1.18E+07 | 9.53E+06 |
| UBAL3_9098G0004   | 4.41E+07 | 3.85E+07 | 4.03E+07 |
| UBAL3_9098G0005   | 4.19E+06 | 3.71E+06 | 3.49E+06 |
| UBAL3_9098G0006   | 1.68E+07 | 1.42E+07 | 1.10E+07 |
| UBAL3_9098G0006.1 | 4.00E+07 | 3.98E+07 | 2.69E+07 |
| UBAL3_9098G0011   | 3.96E+07 | 3.57E+07 | 2.68E+07 |
| UBAL3_9098G0013   | 1.31E+07 | 1.22E+07 | 8.97E+06 |
| UBAL3_9098G0016   | 6.61E+08 | 6.25E+08 | 4.96E+08 |
| UBAL3_9205G0009   | 3.42E+06 | 3.46E+06 | 2.41E+06 |
| UBAL3_9205G0010   | 1.36E+06 | 1.24E+06 | 6.96E+05 |
| UBAL3_9205G0030   | 2.53E+07 | 2.26E+07 | 2.05E+07 |
| UBAL3_9205G0032   | 2.74E+07 | 2.74E+07 | 2.02E+07 |
| UBAL3_9205G0033   | 8.15E+06 | 7.55E+06 | 6.31E+06 |
| UBAL3_9205G0035   | 5.31E+06 | 5.18E+06 | 4.65E+06 |
| UBAL3_9205G0037   | 1.54E+06 | 1.39E+06 | 1.01E+06 |
| UBAL3_9205G0038   | 4.68E+07 | 4.17E+07 | 2.97E+07 |
| UBAL3_9205G0039   | 7.02E+06 | 6.92E+06 | 4.07E+06 |
| UBAL3_9205G0040   | 2.96E+06 | 2.57E+06 | 1.63E+06 |
| UBAL3_9205G0044   | 1.07E+07 | 1.00E+07 | 9.34E+06 |
| UBAL3_9205G0045   | 2.55E+07 | 2.54E+07 | 1.94E+07 |
| UBAL3_9205G0052   | 3.81E+06 | 3.23E+06 | 1.98E+06 |
| UBAL3_9205G0053   | 5.30E+07 | 5.26E+07 | 4.67E+07 |

|                 |          |          |          |
|-----------------|----------|----------|----------|
| UBAL3_9205G0057 | 6.63E+07 | 5.88E+07 | 4.03E+07 |
| UBAL3_9205G0058 | 4.90E+06 | 4.50E+06 | 3.83E+06 |
| UBAL3_9205G0059 | 2.64E+06 | 2.95E+06 | 4.00E+06 |
| UBAL3_9205G0060 | 5.98E+06 | 5.53E+06 | 5.40E+06 |
| UBAL3_9205G0064 | 2.11E+08 | 1.90E+08 | 1.22E+08 |
| UBAL3_9205G0070 | 1.33E+07 | 1.21E+07 | 8.40E+06 |
| UBAL3_9205G0071 | 1.40E+07 | 1.32E+07 | 1.03E+07 |
| UBAL3_9205G0073 | 1.98E+07 | 1.89E+07 | 1.68E+07 |
| UBAL3_9205G0078 | 8.86E+07 | 8.33E+07 | 6.04E+07 |
| UBAL3_9205G0079 | 2.99E+06 | 2.96E+06 | 2.27E+06 |
| UBAL3_9205G0081 | 4.59E+06 | 4.39E+06 | 3.46E+06 |
| UBAL3_9205G0086 | 3.55E+07 | 3.15E+07 | 2.47E+07 |
| UBAL3_9205G0094 | 1.08E+08 | 9.04E+07 | 6.37E+07 |
| UBAL3_9205G0095 | 4.21E+07 | 4.24E+07 | 3.68E+07 |
| UBAL3_9205G0096 | 1.18E+06 | 1.26E+06 | 1.15E+06 |
| UBAL3_9205G0098 | 3.66E+07 | 3.15E+07 | 3.01E+07 |
| UBAL3_9205G0099 | 1.04E+07 | 1.07E+07 | 1.16E+07 |
| UBAL3_9205G0101 | 1.82E+07 | 1.57E+07 | 1.78E+07 |
| UBAL3_9205G0102 | 2.84E+07 | 2.84E+07 | 3.37E+07 |
| UBAL3_9205G0120 | 3.70E+08 | 3.56E+08 | 2.56E+08 |
| UBAL3_9205G0121 | 2.76E+08 | 2.53E+08 | 1.79E+08 |
| UBAL3_9205G0122 | 1.29E+08 | 1.10E+08 | 6.93E+07 |
| UBAL3_9205G0123 | 2.77E+08 | 2.63E+08 | 1.89E+08 |
| UBAL3_9205G0126 | 6.09E+07 | 5.84E+07 | 4.39E+07 |
| UBAL3_9205G0127 | 7.73E+07 | 7.14E+07 | 4.97E+07 |
| UBAL3_9205G0128 | 6.14E+07 | 5.58E+07 | 4.04E+07 |
| UBAL3_9205G0129 | 1.06E+08 | 1.04E+08 | 6.25E+07 |
| UBAL3_9205G0137 | 7.04E+06 | 6.72E+06 | 5.40E+06 |
| UBAL3_9205G0139 | 3.75E+06 | 3.41E+06 | 3.03E+06 |
| UBAL3_9205G0144 | 1.21E+07 | 1.17E+07 | 1.14E+07 |
| UBAL3_9205G0146 | 2.08E+07 | 2.07E+07 | 1.76E+07 |
| UBAL3_9205G0147 | 1.10E+07 | 1.07E+07 | 8.05E+06 |
| UBAL3_9205G0150 | 3.73E+06 | 3.43E+06 | 3.46E+06 |
| UBAL3_9205G0152 | 2.25E+07 | 1.89E+07 | 1.36E+07 |
| UBAL3_9205G0155 | 5.39E+06 | 4.37E+06 | 3.26E+06 |
| UBAL3_9205G0157 | 2.18E+07 | 2.12E+07 | 1.60E+07 |
| UBAL3_9205G0159 | 1.35E+06 | 1.38E+06 | 1.32E+06 |
| UBAL3_9205G0160 | 1.39E+08 | 1.23E+08 | 8.45E+07 |
| UBAL3_9205G0161 | 8.00E+06 | 7.63E+06 | 5.52E+06 |
| UBAL3_9205G0162 | 3.52E+07 | 3.57E+07 | 2.80E+07 |
| UBAL3_9205G0168 | 7.41E+07 | 7.34E+07 | 6.61E+07 |
| UBAL3_9205G0169 | 5.39E+07 | 4.96E+07 | 3.45E+07 |
| UBAL3_9205G0171 | 7.04E+06 | 6.39E+06 | 4.46E+06 |
| UBAL3_9205G0172 | 2.64E+06 | 2.32E+06 | 1.80E+06 |
| UBAL3_9205G0173 | 1.24E+07 | 1.13E+07 | 8.12E+06 |
| UBAL3_9205G0189 | 1.16E+07 | 1.11E+07 | 9.79E+06 |
| UBAL3_9205G0191 | 2.31E+07 | 2.18E+07 | 1.88E+07 |
| UBAL3_9205G0194 | 5.43E+06 | 4.33E+06 | 3.39E+06 |
| UBAL3_9205G0199 | 1.06E+08 | 9.65E+07 | 6.88E+07 |
| UBAL3_9205G0200 | 8.89E+07 | 8.83E+07 | 7.57E+07 |
| UBAL3_9205G0204 | 7.21E+06 | 5.85E+06 | 3.55E+06 |
| UBAL3_9205G0205 | 2.00E+08 | 1.77E+08 | 1.41E+08 |
| UBAL3_9205G0206 | 5.95E+07 | 5.77E+07 | 4.80E+07 |
| UBAL3_9205G0207 | 1.20E+07 | 1.16E+07 | 1.17E+07 |
| UBAL3_9205G0209 | 1.09E+07 | 1.06E+07 | 1.01E+07 |
| UBAL3_9205G0212 | 1.93E+06 | 2.03E+06 | 1.78E+06 |
| UBAL3_9205G0215 | 3.06E+06 | 2.97E+06 | 2.40E+06 |

|                   |          |          |          |
|-------------------|----------|----------|----------|
| UBAL3_9205G0216   | 6.65E+06 | 5.70E+06 | 4.89E+06 |
| UBAL3_9205G0224   | 8.82E+06 | 8.34E+06 | 6.27E+06 |
| UBAL3_9205G0225   | 1.31E+07 | 1.30E+07 | 1.21E+07 |
| UBAL3_9205G0229   | 4.41E+07 | 3.34E+07 | 2.27E+07 |
| UBAL3_9320G0011   | 3.45E+07 | 3.19E+07 | 3.03E+07 |
| UBAL3_9320G0013   | 6.81E+07 | 6.62E+07 | 5.14E+07 |
| UBAL3_9320G0016   | 8.09E+06 | 7.42E+06 | 6.59E+06 |
| UBAL3_9320G0017   | 3.02E+07 | 2.74E+07 | 2.13E+07 |
| UBAL3_9320G0019   | 8.08E+06 | 7.23E+06 | 7.08E+06 |
| UBAL3_9320G0033   | 1.66E+07 | 1.93E+07 | 6.31E+06 |
| UBAL3_9320G0036   | 2.39E+07 | 2.12E+07 | 1.72E+07 |
| UBAL3_9320G0042   | 6.56E+06 | 7.11E+06 | 5.52E+06 |
| UBAL3_9320G0043   | 1.61E+09 | 1.66E+09 | 1.43E+09 |
| UBAL3_9320G0048   | 4.50E+07 | 3.55E+07 | 2.98E+07 |
| UBAL3_9320G0054   | 3.17E+06 | 3.02E+06 | 2.19E+06 |
| UBAL3_9320G0060   | 8.86E+07 | 8.44E+07 | 8.09E+07 |
| UBAL3_9320G0061   | 6.19E+06 | 6.10E+06 | 4.97E+06 |
| UBAL3_9320G0066   | 1.91E+07 | 1.59E+07 | 1.48E+07 |
| UBAL3_9320G0070   | 4.16E+06 | 3.96E+06 | 2.86E+06 |
| UBAL3_9320G0071   | 1.54E+06 | 1.37E+06 | 1.09E+06 |
| UBAL3_9320G0077   | 3.58E+07 | 3.30E+07 | 2.52E+07 |
| UBAL3_9320G0081   | 1.05E+07 | 9.92E+06 | 7.92E+06 |
| UBAL3_9320G0086   | 1.05E+07 | 7.12E+06 | 7.03E+06 |
| UBAL3_9320G0090   | 9.02E+07 | 8.38E+07 | 5.94E+07 |
| UBAL3_9320G0094   | 3.36E+07 | 3.30E+07 | 2.81E+07 |
| UBAL3_9320G0097   | 2.88E+06 | 2.73E+06 | 2.36E+06 |
| UBAL3_9320G0100   | 3.04E+06 | 2.99E+06 | 2.40E+06 |
| UBAL3_9320G0101   | 1.27E+07 | 1.22E+07 | 1.07E+07 |
| UBAL3_9320G0102   | 1.31E+07 | 1.24E+07 | 1.16E+07 |
| UBAL3_9320G0104   | 4.15E+05 | 4.09E+05 | 3.13E+05 |
| UBAL3_9320G0105   | 2.58E+06 | 2.09E+06 | 1.72E+06 |
| UBAL3_9320G0106.1 | 2.85E+07 | 2.60E+07 | 1.90E+07 |
| UBAL3_9320G0107   | 3.69E+07 | 3.34E+07 | 2.51E+07 |
| UBAL3_9320G0110   | 4.86E+06 | 4.48E+06 | 3.84E+06 |
| UBAL3_9320G0112   | 4.41E+06 | 4.01E+06 | 3.22E+06 |
| UBAL3_9320G0116   | 4.71E+07 | 4.04E+07 | 3.34E+07 |
| UBAL3_9320G0117   | 1.06E+07 | 8.45E+06 | 8.11E+06 |
| UBAL3_9320G0120   | 5.04E+07 | 5.02E+07 | 4.45E+07 |
| UBAL3_9320G0123   | 2.24E+07 | 2.05E+07 | 1.42E+07 |
| UBAL3_9320G0125   | 2.92E+06 | 2.74E+06 | 2.34E+06 |
| UBAL3_9367G0003   | 2.55E+07 | 2.43E+07 | 2.10E+07 |
| UBAL3_9367G0005   | 2.90E+06 | 3.12E+06 | 2.94E+06 |
| UBAL3_9367G0006   | 1.17E+08 | 1.09E+08 | 7.94E+07 |
| UBAL3_9417G0002   | 5.87E+06 | 5.37E+06 | 4.37E+06 |
| UBAL3_9417G0005   | 2.22E+06 | 2.17E+06 | 1.64E+06 |
| UBAL3_9417G0009   | 3.31E+07 | 3.23E+07 | 2.54E+07 |
| UBAL3_9417G0011   | 9.50E+06 | 8.84E+06 | 8.82E+06 |
| UBAL3_9417G0012   | 1.03E+08 | 1.11E+08 | 1.66E+08 |
| UBAL3_9417G0013   | 1.34E+06 | 1.36E+06 | 1.04E+06 |
| UBAL3_9417G0014   | 1.35E+07 | 1.31E+07 | 1.15E+07 |
| UBAL3_9417G0015   | 1.38E+06 | 1.27E+06 | 9.92E+05 |
| UBAL3_9417G0016   | 3.66E+06 | 3.42E+06 | 3.02E+06 |
| UBAL3_9417G0017   | 8.46E+06 | 7.75E+06 | 6.53E+06 |
| UBAL3_9417G0021   | 2.99E+08 | 2.83E+08 | 1.83E+08 |
| UBAL3_9417G0022   | 2.20E+07 | 1.95E+07 | 1.69E+07 |
| UBAL3_9417G0029   | 5.52E+07 | 5.14E+07 | 3.94E+07 |
| UBAL3_9417G0040   | 2.56E+07 | 2.44E+07 | 1.93E+07 |

|                   |          |          |          |
|-------------------|----------|----------|----------|
| UBAL3_9417G0044   | 8.54E+06 | 7.98E+06 | 6.58E+06 |
| UBAL3_9417G0045   | 1.07E+07 | 9.95E+06 | 7.78E+06 |
| UBAL3_9417G0046   | 1.86E+07 | 1.85E+07 | 1.62E+07 |
| UBAL3_9417G0047   | 6.84E+07 | 4.91E+07 | 3.45E+07 |
| UBAL3_9417G0049   | 2.93E+07 | 2.84E+07 | 2.77E+07 |
| UBAL3_9417G0050   | 6.49E+06 | 6.64E+06 | 4.52E+06 |
| UBAL3_9417G0051   | 3.44E+06 | 4.10E+06 | 2.84E+06 |
| UBAL3_9417G0054   | 1.23E+08 | 1.14E+08 | 1.04E+08 |
| UBAL3_9417G0056   | 1.12E+08 | 1.02E+08 | 8.19E+07 |
| UBAL3_9417G0057   | 1.79E+07 | 1.62E+07 | 1.22E+07 |
| UBAL3_9417G0058   | 6.14E+07 | 6.27E+07 | 4.65E+07 |
| UBAL3_9417G0059   | 1.57E+06 | 1.30E+06 | 8.66E+05 |
| UBAL3_9417G0061   | 6.78E+06 | 6.25E+06 | 6.09E+06 |
| UBAL3_9417G0062   | 4.04E+07 | 3.74E+07 | 2.75E+07 |
| UBAL3_9417G0063   | 1.57E+06 | 1.54E+06 | 1.63E+06 |
| UBAL3_9417G0069   | 5.96E+06 | 3.88E+06 | 3.28E+06 |
| UBAL3_9417G0074   | 1.32E+08 | 1.30E+08 | 9.48E+07 |
| UBAL3_9417G0076   | 7.18E+06 | 6.25E+06 | 5.47E+06 |
| UBAL3_9417G0077   | 1.13E+07 | 1.06E+07 | 9.87E+06 |
| UBAL3_9417G0079   | 2.33E+06 | 2.29E+06 | 1.78E+06 |
| UBAL3_9417G0081   | 3.49E+06 | 3.51E+06 | 3.09E+06 |
| UBAL3_9424G0003   | 2.21E+06 | 2.13E+06 | 2.11E+06 |
| UBAL3_9424G0007   | 8.82E+06 | 8.41E+06 | 7.12E+06 |
| UBAL3_9424G0008.1 | 1.00E+07 | 9.58E+06 | 9.70E+06 |
| UBAL3_9424G0037   | 6.08E+07 | 5.90E+07 | 4.88E+07 |
| UBAL3_9424G0038   | 1.36E+08 | 1.26E+08 | 9.42E+07 |
| UBAL3_9424G0039   | 1.27E+07 | 1.19E+07 | 9.82E+06 |
| UBAL3_9424G0042   | 2.82E+08 | 2.65E+08 | 2.11E+08 |
| UBAL3_9424G0043   | 3.74E+05 | 4.03E+05 | 4.62E+05 |
| UBAL3_9424G0044   | 2.87E+07 | 2.94E+07 | 2.56E+07 |
| UBAL3_9424G0047   | 4.10E+07 | 3.87E+07 | 3.47E+07 |
| UBAL3_9424G0048   | 3.11E+07 | 2.99E+07 | 2.71E+07 |
| UBAL3_9424G0049   | 1.89E+07 | 1.84E+07 | 1.48E+07 |
| UBAL3_9424G0053   | 2.08E+08 | 1.89E+08 | 1.53E+08 |
| UBAL3_9424G0064   | 3.34E+07 | 3.31E+07 | 3.60E+07 |
| UBAL3_9424G0066   | 8.89E+07 | 9.13E+07 | 7.17E+07 |
| UBAL3_9424G0068   | 1.21E+08 | 1.20E+08 | 1.19E+08 |
| UBAL3_9424G0072   | 6.78E+07 | 6.28E+07 | 5.56E+07 |
| UBAL3_9424G0073   | 6.84E+07 | 6.88E+07 | 5.48E+07 |
| UBAL3_9424G0083   | 6.97E+06 | 7.14E+06 | 7.66E+06 |
| UBAL3_9424G0084   | 6.79E+06 | 6.01E+06 | 4.12E+06 |
| UBAL3_9424G0087   | 4.29E+07 | 4.24E+07 | 3.45E+07 |
| UBAL3_9424G0088   | 2.91E+06 | 2.67E+06 | 2.43E+06 |
| UBAL3_9424G0095   | 1.11E+07 | 1.06E+07 | 7.57E+06 |
| UBAL3_9424G0147   | 1.32E+07 | 1.09E+07 | 7.77E+06 |
| UBAL3_9424G0148   | 1.61E+07 | 1.19E+07 | 9.48E+06 |
| UBAL3_9424G0151   | 2.24E+07 | 2.05E+07 | 1.38E+07 |
| UBAL3_9424G0163   | 5.63E+07 | 5.47E+07 | 4.08E+07 |
| UBAL3_9424G0164   | 2.00E+07 | 1.78E+07 | 1.57E+07 |
| UBAL3_9424G0172   | 4.73E+07 | 4.15E+07 | 2.59E+07 |
| UBAL3_9424G0173   | 3.42E+07 | 3.31E+07 | 2.53E+07 |
| UBAL3_9424G0174   | 2.34E+06 | 2.10E+06 | 1.49E+06 |
| UBAL3_9424G0175   | 2.42E+07 | 2.05E+07 | 1.39E+07 |
| UBAL3_9424G0177   | 3.63E+07 | 2.91E+07 | 2.16E+07 |
| UBAL3_9424G0180   | 1.32E+07 | 1.18E+07 | 1.03E+07 |
| UBAL3_9424G0182   | 8.62E+06 | 7.25E+06 | 5.55E+06 |
| UBAL3_9424G0185   | 4.91E+06 | 4.48E+06 | 3.61E+06 |

|                   |          |          |          |
|-------------------|----------|----------|----------|
| UBAL3_9424G0188   | 7.20E+06 | 6.76E+06 | 4.92E+06 |
| UBAL3_9424G0191   | 1.12E+08 | 1.01E+08 | 7.16E+07 |
| UBAL3_9424G0192.1 | 1.63E+07 | 1.65E+07 | 1.69E+07 |
| UBAL3_9432G0006   | 3.56E+07 | 3.27E+07 | 2.47E+07 |
| UBAL3_9432G0014   | 1.58E+06 | 1.37E+06 | 1.09E+06 |
| UBAL3_9432G0015   | 1.79E+08 | 1.46E+08 | 8.81E+07 |
| UBAL3_9432G0020   | 2.34E+06 | 2.09E+06 | 1.49E+06 |
| UBAL3_9432G0032   | 8.55E+06 | 7.80E+06 | 7.19E+06 |
| UBAL3_9432G0034   | 9.82E+08 | 9.43E+08 | 6.66E+08 |
| UBAL3_9432G0043   | 2.56E+05 | 2.53E+05 | 2.43E+05 |
| UBAL3_9432G0048   | 1.59E+05 | 1.68E+05 | 1.55E+05 |
| UBAL3_9432G0049   | 5.10E+07 | 5.04E+07 | 3.65E+07 |
| UBAL3_9432G0053   | 8.45E+06 | 5.75E+06 | 5.91E+06 |
| UBAL3_9432G0054   | 6.49E+08 | 4.00E+08 | 2.88E+08 |
| UBAL3_9432G0058   | 1.48E+07 | 1.41E+07 | 1.28E+07 |
| UBAL3_9432G0061   | 6.80E+06 | 5.40E+06 | 6.21E+06 |
| UBAL3_9432G0062   | 6.58E+06 | 6.03E+06 | 4.82E+06 |
| UBAL3_9432G0063   | 3.81E+07 | 3.65E+07 | 2.72E+07 |
| UBAL3_9453G0003   | 1.83E+07 | 1.81E+07 | 1.64E+07 |
| UBAL3_9453G0004   | 2.29E+06 | 2.15E+06 | 1.69E+06 |
| UBAL3_9453G0005   | 8.52E+06 | 8.01E+06 | 6.80E+06 |
| UBAL3_9453G0008   | 9.79E+05 | 1.05E+06 | 9.81E+05 |
| UBAL3_9453G0010   | 4.01E+07 | 3.91E+07 | 3.25E+07 |
| UBAL3_9453G0011   | 5.26E+07 | 5.24E+07 | 4.73E+07 |
| UBAL3_9453G0020   | 9.27E+06 | 7.54E+06 | 6.21E+06 |
| UBAL3_9453G0025   | 8.03E+07 | 7.44E+07 | 4.99E+07 |
| UBAL3_9453G0026   | 1.01E+07 | 1.07E+07 | 8.69E+06 |
| UBAL3_9453G0027   | 7.67E+08 | 7.39E+08 | 5.53E+08 |
| UBAL3_9453G0028   | 6.08E+07 | 5.46E+07 | 4.45E+07 |
| UBAL3_9453G0029   | 1.08E+07 | 1.03E+07 | 9.67E+06 |
| UBAL3_9453G0032   | 1.09E+07 | 1.07E+07 | 9.99E+06 |
| UBAL3_9453G0033   | 1.80E+08 | 1.49E+08 | 9.57E+07 |
| UBAL3_9453G0034   | 5.60E+07 | 4.90E+07 | 3.51E+07 |
| UBAL3_9453G0035   | 1.53E+07 | 1.34E+07 | 1.12E+07 |
| UBAL3_9453G0040   | 1.88E+07 | 1.70E+07 | 1.33E+07 |
| UBAL3_9453G0045   | 9.74E+07 | 9.34E+07 | 7.14E+07 |
| UBAL3_9453G0047   | 8.48E+06 | 8.80E+06 | 1.14E+07 |
| UBAL3_9453G0049   | 1.44E+07 | 1.44E+07 | 1.11E+07 |
| UBAL3_9453G0054   | 1.37E+07 | 1.21E+07 | 1.07E+07 |
| UBAL3_9453G0060   | 1.74E+07 | 1.59E+07 | 1.47E+07 |
| UBAL3_9453G0061   | 2.11E+07 | 2.08E+07 | 1.90E+07 |
| UBAL3_9453G0062   | 3.31E+06 | 2.94E+06 | 2.36E+06 |
| UBAL3_9453G0064   | 2.38E+07 | 2.17E+07 | 1.93E+07 |
| UBAL3_9453G0065   | 4.96E+07 | 4.02E+07 | 2.77E+07 |
| UBAL3_9453G0067   | 2.23E+08 | 1.97E+08 | 1.72E+08 |
| UBAL3_9453G0070   | 7.60E+07 | 7.26E+07 | 5.86E+07 |
| UBAL3_9453G0071   | 2.21E+08 | 1.94E+08 | 1.49E+08 |
| UBAL3_9453G0072   | 3.51E+07 | 2.90E+07 | 2.30E+07 |
| UBAL3_9453G0073   | 1.92E+07 | 2.04E+07 | 1.74E+07 |
| UBAL3_9453G0074   | 2.60E+07 | 2.06E+07 | 1.59E+07 |
| UBAL3_9453G0077   | 1.10E+08 | 1.05E+08 | 7.69E+07 |
| UBAL3_9453G0078   | 2.74E+06 | 2.37E+06 | 1.51E+06 |
| UBAL3_9453G0079   | 5.46E+08 | 4.73E+08 | 3.24E+08 |
| UBAL3_9453G0080   | 3.29E+07 | 3.35E+07 | 2.74E+07 |
| UBAL3_9453G0081   | 4.07E+07 | 3.68E+07 | 2.46E+07 |
| UBAL3_9453G0082   | 3.15E+07 | 3.01E+07 | 2.29E+07 |
| UBAL3_9453G0083   | 1.99E+07 | 1.79E+07 | 2.15E+07 |

|                 |          |          |          |
|-----------------|----------|----------|----------|
| UBAL3_9453G0085 | 4.09E+07 | 3.72E+07 | 3.07E+07 |
| UBAL3_9453G0086 | 4.56E+07 | 4.27E+07 | 3.49E+07 |
| UBAL3_9453G0087 | 3.22E+07 | 2.96E+07 | 1.79E+07 |
| UBAL3_9453G0088 | 3.79E+08 | 3.45E+08 | 2.37E+08 |
| UBAL3_9453G0090 | 4.79E+07 | 3.95E+07 | 2.09E+07 |
| UBAL3_9453G0095 | 2.89E+07 | 2.53E+07 | 1.74E+07 |
| UBAL3_9453G0102 | 6.22E+06 | 6.16E+06 | 5.02E+06 |
| UBAL3_9453G0103 | 1.69E+08 | 1.69E+08 | 1.48E+08 |
| UBAL3_9453G0104 | 7.64E+07 | 6.55E+07 | 5.03E+07 |
| UBAL3_9453G0108 | 1.04E+06 | 9.68E+05 | 9.30E+05 |
| UBAL3_9453G0110 | 2.67E+06 | 2.48E+06 | 1.93E+06 |
| UBAL3_9532G0012 | 3.09E+07 | 2.89E+07 | 2.03E+07 |
| UBAL3_9532G0013 | 5.53E+06 | 5.33E+06 | 4.57E+06 |
| UBAL3_9532G0014 | 1.62E+07 | 1.44E+07 | 1.24E+07 |
| UBAL3_9532G0016 | 7.30E+05 | 6.98E+05 | 6.33E+05 |
| UBAL3_9532G0019 | 2.84E+05 | 2.43E+05 | 2.06E+05 |
| UBAL3_9532G0025 | 2.49E+08 | 2.41E+08 | 1.90E+08 |
| UBAL3_9532G0026 | 2.92E+08 | 2.84E+08 | 2.33E+08 |
| UBAL3_9532G0027 | 9.50E+06 | 9.11E+06 | 7.56E+06 |
| UBAL3_9532G0028 | 4.40E+05 | 4.06E+05 | 3.19E+05 |
| UBAL3_9532G0030 | 1.68E+09 | 1.46E+09 | 9.87E+08 |
| UBAL3_9532G0036 | 3.51E+07 | 3.32E+07 | 2.75E+07 |
| UBAL3_9532G0039 | 1.45E+07 | 1.41E+07 | 1.12E+07 |
| UBAL3_9532G0045 | 1.39E+07 | 1.31E+07 | 1.16E+07 |
| UBAL3_9532G0046 | 4.78E+06 | 4.38E+06 | 3.82E+06 |
| UBAL3_9532G0050 | 2.75E+06 | 2.83E+06 | 3.06E+06 |
| UBAL3_9532G0051 | 9.07E+06 | 8.25E+06 | 9.90E+06 |
| UBAL3_9532G0053 | 4.88E+07 | 4.55E+07 | 3.49E+07 |
| UBAL3_9532G0057 | 1.67E+06 | 1.51E+06 | 1.33E+06 |
| UBAL3_9532G0060 | 3.79E+06 | 3.44E+06 | 3.16E+06 |
| UBAL3_9545G0058 | 1.45E+07 | 1.43E+07 | 1.14E+07 |
| UBAL3_9545G0068 | 6.69E+07 | 5.38E+07 | 5.02E+07 |
| UBAL3_9545G0069 | 4.52E+07 | 3.81E+07 | 2.83E+07 |
| UBAL3_9545G0077 | 6.57E+07 | 5.88E+07 | 3.62E+07 |
| UBAL3_9545G0079 | 1.76E+06 | 1.72E+06 | 1.45E+06 |
| UBAL3_9545G0080 | 7.89E+05 | 8.86E+05 | 7.47E+05 |
| UBAL3_9545G0081 | 3.13E+07 | 2.64E+07 | 2.01E+07 |
| UBAL3_9545G0082 | 1.47E+06 | 1.34E+06 | 1.45E+06 |
| UBAL3_9545G0083 | 3.47E+07 | 3.05E+07 | 2.37E+07 |
| UBAL3_9545G0092 | 8.18E+07 | 6.94E+07 | 3.83E+07 |
| UBAL3_9545G0096 | 2.46E+07 | 2.33E+07 | 1.97E+07 |
| UBAL3_9545G0100 | 4.09E+07 | 4.08E+07 | 3.67E+07 |
| UBAL3_9545G0101 | 1.01E+07 | 9.04E+06 | 8.00E+06 |
| UBAL3_9545G0102 | 1.49E+07 | 1.45E+07 | 1.10E+07 |
| UBAL3_9545G0103 | 2.77E+07 | 2.39E+07 | 1.86E+07 |
| UBAL3_9545G0106 | 2.30E+07 | 2.09E+07 | 1.72E+07 |
| UBAL3_9545G0109 | 3.55E+07 | 3.06E+07 | 2.34E+07 |
| UBAL3_9545G0110 | 1.15E+07 | 1.07E+07 | 8.02E+06 |
| UBAL3_9545G0111 | 1.20E+07 | 1.27E+07 | 9.91E+06 |
| UBAL3_9545G0112 | 1.14E+06 | 1.12E+06 | 8.41E+05 |
| UBAL3_9545G0114 | 5.86E+06 | 5.52E+06 | 4.75E+06 |
| UBAL3_9545G0115 | 2.84E+07 | 2.75E+07 | 2.27E+07 |
| UBAL3_9545G0117 | 1.58E+07 | 1.61E+07 | 1.20E+07 |
| UBAL3_9545G0119 | 1.78E+07 | 1.64E+07 | 1.31E+07 |
| UBAL3_9545G0120 | 2.66E+07 | 2.60E+07 | 1.66E+07 |
| UBAL3_9545G0123 | 1.77E+08 | 1.62E+08 | 1.25E+08 |
| UBAL3_9545G0133 | 1.27E+08 | 1.23E+08 | 9.29E+07 |

|                   |          |          |          |
|-------------------|----------|----------|----------|
| UBAL3_9545G0144   | 5.44E+07 | 4.85E+07 | 2.22E+07 |
| UBAL3_9545G0145   | 9.44E+06 | 9.31E+06 | 8.91E+06 |
| UBAL3_9545G0151   | 2.52E+06 | 2.52E+06 | 2.00E+06 |
| UBAL3_9545G0155   | 3.05E+06 | 2.91E+06 | 2.95E+06 |
| UBAL3_9545G0156   | 4.34E+07 | 4.08E+07 | 3.38E+07 |
| UBAL3_9553G0005   | 3.22E+07 | 3.15E+07 | 2.57E+07 |
| UBAL3_9553G0011   | 3.86E+07 | 3.74E+07 | 3.29E+07 |
| UBAL3_9553G0013   | 1.79E+08 | 1.03E+08 | 8.76E+07 |
| UBAL3_9553G0018   | 1.01E+07 | 9.92E+06 | 8.29E+06 |
| UBAL3_9568G0001   | 2.32E+07 | 1.41E+07 | 1.16E+07 |
| UBAL3_9568G0004   | 2.40E+07 | 2.12E+07 | 1.63E+07 |
| UBAL3_9568G0008   | 6.65E+06 | 6.12E+06 | 6.35E+06 |
| UBAL3_9568G0009   | 7.79E+05 | 7.23E+05 | 7.69E+05 |
| UBAL3_9568G0010   | 8.51E+06 | 7.74E+06 | 5.89E+06 |
| UBAL3_9568G0012   | 1.69E+07 | 1.47E+07 | 1.17E+07 |
| UBAL3_9568G0018   | 8.85E+07 | 7.89E+07 | 6.82E+07 |
| UBAL3_9568G0035   | 8.85E+06 | 8.80E+06 | 7.37E+06 |
| UBAL3_9568G0037   | 4.03E+07 | 3.69E+07 | 2.95E+07 |
| UBAL3_9568G0050   | 8.72E+06 | 9.09E+06 | 8.91E+06 |
| UBAL3_9568G0058.1 | 5.11E+06 | 5.86E+06 | 6.01E+06 |
| UBAL3_9568G0068   | 1.31E+07 | 1.36E+07 | 1.40E+07 |
| UBAL3_9568G0069   | 8.23E+06 | 7.92E+06 | 7.09E+06 |
| UBAL3_9568G0070   | 1.96E+07 | 1.82E+07 | 1.62E+07 |
| UBAL3_9568G0071   | 1.17E+07 | 1.10E+07 | 1.11E+07 |
| UBAL3_9568G0073   | 2.05E+06 | 1.69E+06 | 1.49E+06 |
| UBAL3_9568G0082   | 9.25E+06 | 9.09E+06 | 9.11E+06 |
| UBAL3_9568G0085   | 3.28E+07 | 3.03E+07 | 2.26E+07 |
| UBAL3_9568G0086   | 1.90E+07 | 1.73E+07 | 1.30E+07 |
| UBAL3_9568G0088   | 7.58E+06 | 7.68E+06 | 6.98E+06 |
| UBAL3_9568G0089   | 9.66E+05 | 9.45E+05 | 9.78E+05 |
| UBAL3_9568G0090   | 1.93E+07 | 1.85E+07 | 1.56E+07 |
| UBAL3_9568G0091   | 4.41E+06 | 4.28E+06 | 3.44E+06 |
| UBAL3_9568G0092   | 1.98E+07 | 1.90E+07 | 1.76E+07 |
| UBAL3_9568G0094   | 3.39E+07 | 3.16E+07 | 2.72E+07 |
| UBAL3_9568G0095   | 4.28E+06 | 4.09E+06 | 3.64E+06 |
| UBAL3_9568G0128   | 1.14E+07 | 1.15E+07 | 1.14E+07 |
| UBAL3_9568G0134   | 4.30E+06 | 4.19E+06 | 4.38E+06 |
| UBAL3_9568G0138   | 1.74E+06 | 1.59E+06 | 1.31E+06 |
| UBAL3_9568G0142   | 1.02E+08 | 9.45E+07 | 6.50E+07 |
| UBAL3_9568G0143   | 1.18E+07 | 1.12E+07 | 1.15E+07 |
| UBAL3_9595G0002   | 3.88E+07 | 3.75E+07 | 3.46E+07 |
| UBAL3_9595G0004   | 3.26E+07 | 2.98E+07 | 3.01E+07 |
| UBAL3_9595G0006   | 2.74E+07 | 3.05E+07 | 2.87E+07 |
| UBAL3_9595G0010   | 1.69E+08 | 1.42E+08 | 1.13E+08 |
| UBAL3_9595G0011   | 2.07E+07 | 1.92E+07 | 1.39E+07 |
| UBAL3_9595G0015   | 3.27E+07 | 2.92E+07 | 2.61E+07 |
| UBAL3_9595G0016   | 1.88E+07 | 2.04E+07 | 1.71E+07 |
| UBAL3_9595G0017   | 6.25E+06 | 6.07E+06 | 4.17E+06 |
| UBAL3_9595G0021   | 8.82E+06 | 9.20E+06 | 8.02E+06 |
| UBAL3_9595G0023   | 1.76E+07 | 1.72E+07 | 1.65E+07 |
| UBAL3_9595G0025   | 4.34E+07 | 4.16E+07 | 3.43E+07 |
| UBAL3_9595G0027   | 1.79E+07 | 1.75E+07 | 1.49E+07 |
| UBAL3_9595G0031   | 9.11E+06 | 8.14E+06 | 6.69E+06 |
| UBAL3_9595G0032   | 1.67E+06 | 1.62E+06 | 1.23E+06 |
| UBAL3_9595G0044   | 6.26E+07 | 5.65E+07 | 4.75E+07 |
| UBAL3_9595G0045   | 9.94E+07 | 8.99E+07 | 6.85E+07 |
| UBAL3_9595G0046   | 6.53E+06 | 6.04E+06 | 5.29E+06 |

|                    |          |          |          |
|--------------------|----------|----------|----------|
| UBAL3_9595G0051    | 1.87E+07 | 1.74E+07 | 1.51E+07 |
| UBAL3_9595G0061    | 1.69E+08 | 1.27E+08 | 8.47E+07 |
| UBAL3_9612G0004    | 5.72E+07 | 6.21E+07 | 5.50E+07 |
| UBAL3_9612G0010    | 2.43E+07 | 1.87E+07 | 1.72E+07 |
| UBAL3_9612G0012    | 9.31E+06 | 7.59E+06 | 7.11E+06 |
| UBAL3_9612G0013    | 4.75E+06 | 3.49E+06 | 2.35E+06 |
| UBAL3_9612G0014    | 2.27E+06 | 2.12E+06 | 1.82E+06 |
| UBAL3_9612G0016    | 3.66E+07 | 3.27E+07 | 2.25E+07 |
| UBAL3_9612G0017    | 2.01E+08 | 1.66E+08 | 1.03E+08 |
| UBAL3_9612G0037    | 1.52E+07 | 1.45E+07 | 1.22E+07 |
| UBAL3_9615G0001    | 1.55E+08 | 1.33E+08 | 9.77E+07 |
| UBAL3_9615G0001.1  | 7.98E+07 | 7.13E+07 | 4.28E+07 |
| UBAL3_9615G0002    | 8.68E+06 | 7.28E+06 | 5.71E+06 |
| UBAL3_9615G0004    | 4.46E+07 | 3.75E+07 | 2.58E+07 |
| UBAL3_9615G0007    | 3.54E+07 | 3.45E+07 | 2.99E+07 |
| UBAL3_9615G0009    | 1.79E+07 | 1.59E+07 | 1.25E+07 |
| UBAL3_9615G0010    | 3.38E+07 | 3.03E+07 | 2.48E+07 |
| UBAL3_9615G0011    | 3.13E+07 | 3.04E+07 | 2.58E+07 |
| UBAL3_9615G0014    | 3.06E+07 | 2.85E+07 | 2.30E+07 |
| UBAL3_9615G0015    | 2.65E+07 | 2.40E+07 | 2.07E+07 |
| UBAL3_9627G0005    | 3.11E+07 | 2.73E+07 | 2.28E+07 |
| UBAL3_9627G0008    | 1.57E+07 | 1.50E+07 | 1.32E+07 |
| UBAL3_9627G0009    | 2.32E+07 | 1.97E+07 | 1.56E+07 |
| UBAL3_9627G0012    | 4.15E+06 | 3.86E+06 | 2.01E+06 |
| UBAL3_9627G0029    | 1.59E+08 | 1.43E+08 | 1.35E+08 |
| UNLACT1_11998G0005 | 2.34E+06 | 2.77E+06 | 4.79E+06 |
| UNLACT1_12268G0005 | 3.33E+06 | 2.98E+06 | 2.38E+06 |
| UNLACT1_12314G0005 | 8.35E+05 | 7.50E+05 | 6.76E+05 |
| UNLACT1_12704G0005 | 1.21E+05 | 1.13E+05 | 9.74E+04 |
| UNLACT1_1674G0001  | 2.52E+07 | 1.95E+07 | 5.50E+06 |
| UNLACT1_9014G0001  | 9.21E+06 | 1.35E+07 | 1.84E+07 |
| UNLACT1_9852G0001  | 6.80E+05 | 5.84E+05 | 5.54E+05 |
| UNLACT2_10378G0001 | 4.01E+07 | 3.74E+07 | 3.01E+07 |
| UNLACT2_11403G0003 | 1.73E+06 | 2.20E+06 | 3.92E+06 |
| UNLACT2_6949G0001  | 9.52E+05 | 1.50E+06 | 1.90E+06 |
| UNLACT2_8793G0003  | 3.77E+06 | 3.83E+06 | 7.52E+06 |
| UNLACT2_9443G0004  | 5.23E+06 | 5.54E+06 | 5.19E+06 |
| UNLACT2_9552G0002  | 3.31E+05 | 3.43E+05 | 2.06E+05 |
| UNLACT2_9725G0002  | 3.09E+06 | 3.00E+06 | 7.06E+06 |
| UNLAR2_15003G0480  | 5.77E+05 | 4.52E+05 | 5.81E+05 |
| UNLAR2_15008G0692  | 7.78E+07 | 1.16E+08 | 1.46E+08 |
| UNLAR2_15008G0750  | 4.81E+05 | 5.67E+05 | 1.02E+06 |
| UNLAR2_15008G0796  | 1.45E+07 | 1.68E+07 | 1.37E+07 |
| UNLAR4_1G0037      | 1.64E+06 | 1.16E+06 | 7.41E+05 |
| UNLAR4_1G0062      | 3.49E+07 | 2.66E+07 | 1.59E+07 |
| UNLAR4_1G0064      | 7.40E+06 | 4.84E+06 | 3.58E+06 |
| UNLAR4_1G0095      | 9.73E+06 | 1.08E+07 | 9.90E+06 |
| UNLAR4_1G0177      | 5.88E+06 | 3.93E+06 | 3.13E+06 |
| UNLAR4_1G0224      | 2.24E+08 | 1.23E+08 | 7.84E+07 |
| UNLAR4_1G0690      | 8.54E+06 | 7.40E+06 | 5.77E+06 |
| UNLAR4_1G0751      | 3.82E+06 | 2.63E+06 | 1.88E+06 |
| UNLAR4_1G0755      | 1.04E+07 | 9.18E+06 | 7.92E+06 |
| UNLAR4_1G0868      | 2.11E+06 | 1.71E+06 | 1.72E+06 |
| UNLAR4_1G0951      | 1.50E+06 | 1.17E+06 | 1.07E+06 |
| UNLAR5_1G0125      | 3.28E+06 | 2.54E+06 | 3.37E+06 |
| UNLAR5_1G0341      | 4.51E+05 | 4.63E+05 | 2.67E+05 |
| UNLAR5_1G0597      | 2.68E+06 | 2.46E+06 | 2.73E+06 |



|                   |          |          |          |
|-------------------|----------|----------|----------|
| UNLAR5_1G0648     | 4.02E+05 | 4.16E+05 | 7.60E+05 |
| UNLAR5_1G0857     | 1.03E+06 | 1.02E+06 | 6.19E+05 |
| UNLAR5_1G0886     | 2.25E+05 | 1.81E+05 | 1.84E+05 |
| UNLEPL_15243G0285 | 5.54E+05 | 4.92E+05 | 6.73E+05 |
| UNLEPL_15243G0425 | 3.54E+05 | 4.75E+05 | 8.27E+05 |
| UNLEPL_15243G0827 | 1.36E+06 | 1.48E+06 | 9.10E+05 |
| UNLEPL_17965G0293 | 1.18E+06 | 2.00E+06 | 1.90E+06 |
| UNLFIR_10385G0002 | 1.92E+06 | 1.67E+06 | 1.63E+06 |
| UNLFIR_11324G0005 | 2.65E+05 | 4.43E+05 | 2.18E+05 |
| UNLFIR_9955G0001  | 1.94E+06 | 1.70E+06 | 1.40E+06 |
| UNLGPL_12302G0010 | 8.54E+06 | 9.34E+06 | 8.91E+06 |
| UNLGPL_12302G0022 | 3.12E+06 | 3.20E+06 | 2.56E+06 |
| UNLGPL_12303G0012 | 1.29E+07 | 1.43E+07 | 1.06E+07 |
| UNLGPL_12303G0020 | 3.69E+06 | 3.80E+06 | 3.06E+06 |
| UNLGPL_12303G0022 | 3.49E+06 | 3.82E+06 | 4.30E+06 |
| UNLGPL_12303G0024 | 2.15E+06 | 2.65E+06 | 1.80E+06 |
| UNLGPL_13287G0011 | 2.85E+07 | 3.16E+07 | 2.37E+07 |
| UNLGPL_13287G0015 | 1.91E+06 | 2.11E+06 | 1.33E+06 |
| UNLGPL_13287G0025 | 3.83E+06 | 4.48E+06 | 3.20E+06 |
| UNLGPL_13287G0028 | 9.92E+06 | 1.09E+07 | 1.02E+07 |
| UNLGPL_13287G0032 | 1.22E+06 | 1.30E+06 | 1.11E+06 |
| UNLGPL_13287G0036 | 8.66E+07 | 9.48E+07 | 8.15E+07 |
| UNLGPL_13287G0071 | 3.31E+06 | 3.19E+06 | 2.27E+06 |
| UNLGPL_13287G0078 | 8.65E+06 | 9.23E+06 | 7.98E+06 |
| UNLGPL_13287G0116 | 9.72E+06 | 9.70E+06 | 8.56E+06 |
| UNLGPL_13287G0119 | 3.97E+06 | 4.42E+06 | 3.80E+06 |
| UNLGPL_13287G0131 | 4.23E+06 | 4.49E+06 | 3.97E+06 |
| UNLGPL_13287G0134 | 3.60E+06 | 3.77E+06 | 2.57E+06 |
| UNLGPL_13287G0148 | 3.08E+06 | 3.65E+06 | 4.19E+06 |
| UNLGPL_13287G0149 | 1.01E+07 | 1.26E+07 | 9.83E+06 |
| UNLGPL_13287G0152 | 1.39E+07 | 1.56E+07 | 1.24E+07 |
| UNLGPL_13287G0167 | 2.84E+07 | 3.50E+07 | 2.47E+07 |
| UNLGPL_13287G0168 | 2.91E+07 | 3.10E+07 | 2.56E+07 |
| UNLGPL_13287G0173 | 1.33E+07 | 1.18E+07 | 9.73E+06 |
| UNLGPL_13287G0175 | 9.46E+06 | 1.05E+07 | 1.18E+07 |
| UNLGPL_13290G0006 | 3.60E+06 | 4.22E+06 | 3.96E+06 |
| UNLGPL_13290G0008 | 1.64E+06 | 1.83E+06 | 2.00E+06 |
| UNLGPL_13290G0010 | 2.38E+07 | 2.52E+07 | 1.94E+07 |
| UNLGPL_13290G0021 | 4.90E+06 | 5.35E+06 | 4.72E+06 |
| UNLGPL_13290G0024 | 3.62E+07 | 4.42E+07 | 3.47E+07 |
| UNLGPL_13290G0027 | 6.35E+06 | 7.36E+06 | 6.39E+06 |
| UNLGPL_13290G0031 | 4.31E+06 | 4.73E+06 | 3.98E+06 |
| UNLGPL_13290G0044 | 2.47E+07 | 2.83E+07 | 2.50E+07 |
| UNLGPL_13290G0045 | 4.19E+06 | 4.32E+06 | 3.66E+06 |
| UNLGPL_13290G0063 | 1.61E+06 | 1.58E+06 | 1.25E+06 |
| UNLGPL_13290G0066 | 1.42E+06 | 1.38E+06 | 1.27E+06 |
| UNLGPL_13290G0071 | 3.04E+07 | 3.54E+07 | 3.13E+07 |
| UNLGPL_13290G0075 | 2.78E+06 | 2.46E+06 | 1.58E+06 |
| UNLGPL_13290G0079 | 2.43E+07 | 2.67E+07 | 2.12E+07 |
| UNLGPL_13290G0080 | 7.71E+07 | 7.97E+07 | 4.58E+07 |
| UNLGPL_13290G0092 | 1.24E+07 | 2.08E+07 | 1.21E+07 |
| UNLGPL_13290G0105 | 2.86E+06 | 3.17E+06 | 2.55E+06 |
| UNLGPL_13290G0114 | 7.97E+07 | 9.52E+07 | 8.41E+07 |
| UNLGPL_13290G0118 | 2.55E+07 | 2.96E+07 | 2.98E+07 |
| UNLGPL_13290G0148 | 4.20E+06 | 5.23E+06 | 4.61E+06 |
| UNLGPL_13290G0151 | 6.27E+06 | 6.67E+06 | 7.66E+06 |
| UNLGPL_13290G0166 | 4.36E+06 | 5.23E+06 | 4.24E+06 |

|                   |          |          |          |
|-------------------|----------|----------|----------|
| UNLGPL_13290G0173 | 3.61E+06 | 4.09E+06 | 2.91E+06 |
| UNLGPL_13290G0186 | 3.91E+06 | 3.72E+06 | 3.43E+06 |
| UNLGPL_13296G0004 | 8.33E+06 | 9.50E+06 | 7.65E+06 |
| UNLGPL_13296G0006 | 1.36E+06 | 1.55E+06 | 1.42E+06 |
| UNLGPL_13296G0008 | 2.51E+07 | 2.83E+07 | 2.63E+07 |
| UNLGPL_13296G0025 | 2.52E+06 | 2.78E+06 | 2.60E+06 |
| UNLGPL_13296G0026 | 1.10E+07 | 1.17E+07 | 1.01E+07 |
| UNLGPL_13296G0034 | 4.45E+06 | 4.45E+06 | 3.17E+06 |
| UNLGPL_13296G0045 | 7.30E+06 | 8.01E+06 | 6.43E+06 |
| UNLGPL_13296G0046 | 5.18E+06 | 5.05E+06 | 4.20E+06 |
| UNLGPL_13296G0047 | 2.62E+07 | 2.69E+07 | 2.04E+07 |
| UNLGPL_13296G0074 | 2.88E+06 | 3.20E+06 | 3.30E+06 |
| UNLGPL_13296G0075 | 1.81E+06 | 1.86E+06 | 1.40E+06 |
| UNLGPL_13296G0079 | 1.74E+07 | 1.86E+07 | 1.60E+07 |
| UNLGPL_13296G0091 | 1.20E+07 | 1.32E+07 | 9.83E+06 |
| UNLGPL_13296G0092 | 5.24E+06 | 5.85E+06 | 4.16E+06 |
| UNLGPL_13296G0095 | 9.74E+06 | 1.10E+07 | 7.69E+06 |
| UNLGPL_13296G0096 | 4.91E+06 | 5.44E+06 | 4.13E+06 |
| UNLGPL_13296G0109 | 2.70E+06 | 2.59E+06 | 1.89E+06 |
| UNLGPL_13296G0110 | 8.44E+05 | 8.85E+05 | 7.78E+05 |
| UNLGPL_13296G0117 | 4.68E+06 | 4.87E+06 | 4.12E+06 |
| UNLGPL_13327G0007 | 5.98E+06 | 6.80E+06 | 6.06E+06 |
| UNLGPL_13327G0008 | 2.39E+08 | 2.89E+08 | 2.40E+08 |
| UNLGPL_13327G0009 | 1.30E+07 | 1.46E+07 | 9.90E+06 |
| UNLGPL_13327G0015 | 2.01E+07 | 2.10E+07 | 1.68E+07 |
| UNLGPL_13327G0019 | 9.39E+05 | 9.15E+05 | 9.91E+05 |
| UNLGPL_13327G0045 | 2.61E+07 | 2.91E+07 | 2.68E+07 |
| UNLGPL_13327G0048 | 7.06E+07 | 9.90E+07 | 9.86E+07 |
| UNLGPL_13327G0049 | 4.11E+06 | 4.34E+06 | 3.80E+06 |
| UNLGPL_13327G0054 | 9.15E+05 | 9.93E+05 | 7.90E+05 |
| UNLGPL_13327G0055 | 1.07E+08 | 9.69E+07 | 7.55E+07 |
| UNLGPL_13327G0057 | 2.58E+06 | 2.30E+06 | 2.27E+06 |
| UNLGPL_13327G0058 | 3.74E+06 | 3.52E+06 | 2.69E+06 |
| UNLGPL_13327G0060 | 1.58E+07 | 1.49E+07 | 1.23E+07 |
| UNLGPL_13327G0078 | 4.46E+06 | 4.73E+06 | 3.78E+06 |
| UNLGPL_13327G0079 | 1.67E+06 | 1.75E+06 | 1.71E+06 |
| UNLGPL_13334G0013 | 9.46E+06 | 1.12E+07 | 7.39E+06 |
| UNLGPL_13334G0014 | 1.96E+07 | 2.21E+07 | 2.02E+07 |
| UNLGPL_13334G0022 | 1.29E+08 | 1.76E+08 | 1.61E+08 |
| UNLGPL_13334G0035 | 3.23E+07 | 3.74E+07 | 3.88E+07 |
| UNLGPL_13334G0042 | 2.36E+06 | 2.89E+06 | 4.44E+06 |
| UNLGPL_13334G0047 | 1.18E+08 | 1.41E+08 | 1.00E+08 |
| UNLGPL_13334G0050 | 5.67E+05 | 4.94E+05 | 3.67E+05 |
| UNLGPL_13334G0053 | 1.28E+08 | 1.55E+08 | 1.50E+08 |
| UNLGPL_13334G0054 | 3.92E+06 | 3.87E+06 | 3.11E+06 |
| UNLGPL_13334G0055 | 8.17E+05 | 9.06E+05 | 9.54E+05 |
| UNLGPL_13334G0059 | 2.42E+06 | 2.17E+06 | 2.38E+06 |
| UNLGPL_13334G0067 | 3.65E+07 | 4.03E+07 | 3.39E+07 |
| UNLGPL_13334G0074 | 1.97E+06 | 2.13E+06 | 1.87E+06 |
| UNLGPL_13334G0078 | 2.64E+06 | 2.61E+06 | 2.57E+06 |
| UNLGPL_13334G0079 | 2.27E+07 | 2.80E+07 | 2.60E+07 |
| UNLGPL_13334G0092 | 2.11E+07 | 2.28E+07 | 1.88E+07 |
| UNLGPL_13334G0098 | 3.29E+06 | 3.59E+06 | 3.11E+06 |
| UNLGPL_13334G0104 | 1.97E+06 | 2.06E+06 | 2.00E+06 |
| UNLGPL_13334G0125 | 1.02E+07 | 1.07E+07 | 8.30E+06 |
| UNLGPL_13334G0127 | 1.11E+07 | 1.27E+07 | 9.84E+06 |
| UNLGPL_13334G0129 | 3.67E+06 | 3.47E+06 | 2.55E+06 |

|                   |          |          |          |
|-------------------|----------|----------|----------|
| UNLGPL_13334G0132 | 2.20E+07 | 2.33E+07 | 1.95E+07 |
| UNLGPL_13334G0163 | 7.56E+07 | 8.27E+07 | 8.37E+07 |
| UNLGPL_13334G0165 | 3.27E+07 | 3.67E+07 | 3.33E+07 |
| UNLGPL_13334G0187 | 1.18E+06 | 1.38E+06 | 1.14E+06 |
| UNLGPL_13374G0008 | 2.99E+06 | 3.62E+06 | 3.48E+06 |
| UNLGPL_13374G0020 | 1.54E+06 | 1.61E+06 | 1.51E+06 |
| UNLGPL_13374G0022 | 4.18E+07 | 4.67E+07 | 3.53E+07 |
| UNLGPL_13374G0024 | 1.19E+07 | 1.44E+07 | 1.26E+07 |
| UNLGPL_13374G0049 | 1.52E+06 | 1.35E+06 | 1.32E+06 |
| UNLGPL_13374G0065 | 3.42E+07 | 3.99E+07 | 3.30E+07 |
| UNLGPL_13374G0066 | 6.86E+05 | 8.49E+05 | 7.39E+05 |
| UNLGPL_13374G0068 | 2.26E+07 | 2.42E+07 | 1.99E+07 |
| UNLGPL_13374G0072 | 3.28E+07 | 3.86E+07 | 2.99E+07 |
| UNLGPL_13374G0081 | 2.61E+07 | 2.82E+07 | 2.39E+07 |
| UNLGPL_13374G0086 | 1.11E+08 | 1.25E+08 | 1.03E+08 |
| UNLGPL_13374G0087 | 5.05E+06 | 4.94E+06 | 4.60E+06 |
| UNLGPL_13374G0091 | 2.16E+07 | 2.42E+07 | 2.02E+07 |
| UNLGPL_13374G0101 | 5.39E+07 | 5.82E+07 | 5.14E+07 |
| UNLGPL_13374G0103 | 2.12E+06 | 2.27E+06 | 1.93E+06 |
| UNLGPL_13374G0104 | 3.39E+08 | 5.22E+08 | 4.89E+08 |
| UNLGPL_13374G0105 | 5.06E+07 | 5.76E+07 | 4.97E+07 |
| UNLGPL_13374G0106 | 3.34E+06 | 3.16E+06 | 2.37E+06 |
| UNLGPL_13374G0107 | 9.34E+06 | 1.06E+07 | 1.06E+07 |
| UNLGPL_13374G0108 | 2.97E+06 | 3.23E+06 | 2.44E+06 |
| UNLGPL_13374G0117 | 4.00E+06 | 4.15E+06 | 3.56E+06 |
| UNLGPL_13374G0118 | 5.47E+06 | 7.17E+06 | 4.50E+06 |
| UNLGPL_13374G0128 | 8.27E+07 | 9.60E+07 | 6.92E+07 |
| UNLGPL_13374G0134 | 4.90E+06 | 5.72E+06 | 6.99E+06 |
| UNLGPL_13374G0138 | 1.19E+07 | 1.26E+07 | 1.11E+07 |
| UNLGPL_13374G0164 | 1.20E+08 | 1.45E+08 | 1.05E+08 |
| UNLGPL_13374G0178 | 7.41E+06 | 8.58E+06 | 5.75E+06 |
| UNLGPL_13374G0182 | 4.42E+05 | 4.55E+05 | 4.95E+05 |
| UNLGPL_13374G0186 | 2.86E+07 | 3.17E+07 | 3.09E+07 |
| UNLGPL_13455G0005 | 2.30E+06 | 2.55E+06 | 2.10E+06 |
| UNLGPL_13455G0013 | 1.78E+06 | 1.86E+06 | 1.61E+06 |
| UNLGPL_13455G0035 | 1.96E+07 | 2.27E+07 | 1.98E+07 |
| UNLGPL_13455G0037 | 1.37E+06 | 1.39E+06 | 9.31E+05 |
| UNLGPL_13455G0038 | 2.87E+06 | 2.81E+06 | 2.25E+06 |
| UNLGPL_13455G0058 | 4.31E+07 | 4.98E+07 | 3.15E+07 |
| UNLGPL_13455G0061 | 9.93E+06 | 1.12E+07 | 1.48E+07 |
| UNLGPL_13455G0063 | 1.82E+07 | 2.10E+07 | 1.46E+07 |
| UNLGPL_13455G0066 | 1.27E+08 | 1.42E+08 | 4.91E+07 |
| UNLGPL_13455G0071 | 1.21E+06 | 1.26E+06 | 9.74E+05 |
| UNLGPL_13455G0081 | 1.64E+07 | 1.94E+07 | 1.73E+07 |
| UNLGPL_13455G0088 | 4.21E+06 | 4.75E+06 | 4.12E+06 |
| UNLGPL_13455G0103 | 2.67E+07 | 2.80E+07 | 1.88E+07 |
| UNLGPL_13459G0006 | 3.15E+08 | 4.48E+08 | 4.53E+08 |
| UNLGPL_13459G0010 | 9.05E+05 | 9.22E+05 | 8.38E+05 |
| UNLGPL_13459G0036 | 4.92E+07 | 5.43E+07 | 4.63E+07 |
| UNLGPL_13459G0040 | 9.06E+07 | 1.03E+08 | 9.66E+07 |
| UNLGPL_13459G0041 | 1.50E+07 | 1.53E+07 | 1.17E+07 |
| UNLGPL_13459G0043 | 4.75E+06 | 5.21E+06 | 3.93E+06 |
| UNLGPL_13459G0072 | 1.74E+06 | 1.94E+06 | 1.54E+06 |
| UNLGPL_13459G0074 | 1.36E+07 | 1.30E+07 | 9.06E+06 |
| UNLGPL_13459G0096 | 9.12E+06 | 9.90E+06 | 8.02E+06 |
| UNLGPL_13459G0100 | 5.68E+07 | 6.04E+07 | 4.59E+07 |
| UNLGPL_13459G0102 | 4.71E+06 | 5.26E+06 | 4.97E+06 |

|                   |          |          |          |
|-------------------|----------|----------|----------|
| UNLGPL_13459G0107 | 4.32E+06 | 4.36E+06 | 4.30E+06 |
| UNLGPL_13459G0108 | 9.23E+05 | 9.98E+05 | 9.34E+05 |
| UNLGPL_13459G0128 | 6.50E+06 | 6.60E+06 | 6.03E+06 |
| UNLGPL_13459G0131 | 1.08E+08 | 1.20E+08 | 8.37E+07 |
| UNLGPL_13459G0134 | 6.79E+06 | 7.25E+06 | 5.87E+06 |
| UNLGPL_13459G0135 | 1.73E+07 | 2.00E+07 | 1.43E+07 |
| UNLGPL_13459G0136 | 2.54E+06 | 2.93E+06 | 2.05E+06 |
| UNLGPL_13459G0142 | 5.60E+07 | 6.43E+07 | 5.70E+07 |
| UNLGPL_13459G0151 | 7.28E+06 | 8.18E+06 | 7.19E+06 |
| UNLGPL_13459G0154 | 7.15E+06 | 7.20E+06 | 6.35E+06 |
| UNLGPL_13459G0156 | 7.06E+06 | 7.54E+06 | 6.16E+06 |
| UNLGPL_13459G0161 | 3.46E+06 | 2.95E+06 | 1.92E+06 |
| UNLGPL_13459G0162 | 4.13E+07 | 4.55E+07 | 4.10E+07 |
| UNLGPL_13459G0171 | 3.52E+06 | 3.83E+06 | 3.17E+06 |
| UNLGPL_13459G0182 | 1.57E+07 | 1.85E+07 | 1.64E+07 |
| UNLGPL_13459G0183 | 1.13E+08 | 1.40E+08 | 1.04E+08 |
| UNLGPL_13459G0187 | 5.35E+06 | 5.90E+06 | 5.23E+06 |
| UNLGPL_13459G0188 | 8.71E+07 | 1.04E+08 | 7.85E+07 |
| UNLGPL_13459G0208 | 4.90E+06 | 5.15E+06 | 3.42E+06 |
| UNLGPL_13459G0211 | 2.56E+06 | 2.59E+06 | 2.28E+06 |
| UNLGPL_13459G0212 | 9.87E+06 | 9.92E+06 | 8.44E+06 |
| UNLGPL_13459G0213 | 3.32E+07 | 3.64E+07 | 3.00E+07 |
| UNLGPL_13459G0219 | 3.00E+07 | 3.39E+07 | 3.13E+07 |
| UNLGPL_13459G0225 | 1.23E+07 | 1.34E+07 | 1.19E+07 |
| UNLGPL_13459G0229 | 1.98E+07 | 2.11E+07 | 1.80E+07 |
| UNLGPL_13459G0230 | 3.69E+06 | 4.42E+06 | 3.55E+06 |
| UNLGPL_13459G0231 | 4.91E+05 | 4.99E+05 | 4.87E+05 |
| UNLGPL_13459G0235 | 1.49E+06 | 1.33E+06 | 8.58E+05 |
| UNLGPL_13459G0236 | 2.78E+06 | 2.77E+06 | 2.73E+06 |
| UNLGPL_13459G0239 | 2.79E+07 | 3.05E+07 | 2.24E+07 |
| UNLGPL_13459G0248 | 2.40E+06 | 2.46E+06 | 2.37E+06 |
| UNLGPL_13459G0249 | 8.67E+05 | 1.05E+06 | 9.10E+05 |
| UNLGPL_13459G0255 | 3.47E+07 | 3.97E+07 | 3.27E+07 |
| UNLGPL_13459G0258 | 2.62E+07 | 2.79E+07 | 2.29E+07 |
| UNLGPL_13459G0259 | 6.92E+07 | 7.47E+07 | 6.17E+07 |
| UNLGPL_13459G0263 | 7.97E+06 | 8.65E+06 | 8.50E+06 |
| UNLGPL_13459G0282 | 6.31E+06 | 7.74E+06 | 1.14E+07 |
| UNLGPL_13459G0287 | 6.64E+07 | 7.93E+07 | 5.88E+07 |
| UNLGPL_13459G0310 | 1.27E+07 | 1.32E+07 | 9.77E+06 |
| UNLGPL_13459G0328 | 6.86E+06 | 8.41E+06 | 5.36E+06 |
| UNLGPL_13477G0019 | 1.79E+07 | 1.93E+07 | 1.51E+07 |
| UNLGPL_13477G0027 | 1.08E+07 | 1.29E+07 | 1.38E+07 |
| UNLGPL_13477G0036 | 2.07E+06 | 2.25E+06 | 1.87E+06 |
| UNLGPL_13477G0046 | 1.99E+06 | 2.28E+06 | 1.99E+06 |
| UNLGPL_13477G0070 | 1.44E+07 | 1.14E+07 | 1.21E+07 |
| UNLIPL_13249G0012 | 2.65E+06 | 1.94E+06 | 2.85E+06 |
| UNLIPL_13606G0018 | 3.06E+07 | 4.69E+07 | 9.27E+07 |
| UNLIPL_13606G0057 | 8.99E+06 | 1.09E+07 | 7.91E+06 |
| UNLIPL_13606G0121 | 8.31E+05 | 1.02E+06 | 1.42E+06 |
| UNLIPL_13606G0200 | 4.20E+04 | 4.32E+04 | 3.76E+04 |
| UNLIPL_13624G0064 | 1.78E+06 | 1.29E+06 | 1.05E+06 |
| UNLIPL_13624G0276 | 3.24E+07 | 2.81E+07 | 1.90E+07 |
| UNLIPL_13624G0297 | 1.42E+06 | 1.13E+06 | 9.48E+05 |
| UNLIPL_15911G0419 | 1.93E+06 | 2.25E+06 | 5.34E+06 |
| UNLIPL_15911G0557 | 4.14E+05 | 3.50E+05 | 2.04E+05 |
| UNLPLA_15548G0011 | 1.55E+06 | 1.97E+06 | 2.66E+06 |
| UNLPLA_15611G0007 | 1.31E+06 | 1.60E+06 | 2.89E+06 |

|                   |          |          |          |
|-------------------|----------|----------|----------|
| UNLPLA_15611G0013 | 1.81E+07 | 2.43E+07 | 5.14E+07 |
| UNLPLA_15618G0024 | 5.03E+06 | 6.12E+06 | 8.28E+06 |
| UNLPLA_15659G0020 | 2.81E+06 | 3.16E+06 | 1.67E+06 |
| UNLPLA_15659G0075 | 9.74E+05 | 1.19E+06 | 2.29E+06 |
| UNLPLA_15689G0157 | 5.75E+06 | 9.18E+06 | 2.22E+07 |
