# Supplementary material
Source: PubMed Central journal article supplement (PMC4274423)
Supplement: ismej2014113x6.pdf [file ismej2014113x6.pdf]

**Supplemental Table S2.** Number of proteins quantified per organism. Only proteins quantified with unique peptides were considered.

| <b>Organism</b>                              | <b>No. of Proteins</b> |
|----------------------------------------------|------------------------|
| <b>Bacteria:</b>                             |                        |
| <i>Leptospirillum</i> group II CG 5-way type | 195                    |
| <i>Leptospirillum</i> group II UBA type      | 197                    |
| <i>Leptospirillum</i> group II C75 type      | 11                     |
| <i>Leptospirillum</i> group III              | 695                    |
| <i>Leptospirillum</i> group IV               | 27                     |
| Actinobacteria I                             | 7                      |
| Actinobacteria II                            | 7                      |
| Firmicutes                                   | 3                      |
| <i>Sulfobacillus</i> III                     | 6                      |
| <b>Archaea:</b>                              |                        |
| A-plasma I                                   | 74                     |
| A-plasma II                                  | 1                      |
| C-plasma                                     | 4                      |
| D-plasma                                     | 6                      |
| E-plasma                                     | 4                      |
| G-plasma                                     | 206                    |
| I-plasma                                     | 10                     |
| <i>Ferroplasma</i> I                         | 25                     |
| <i>Ferroplasma</i> II                        | 12                     |
| Arman I                                      | 6                      |
| Arman II                                     | 4                      |
| Arman IV                                     | 11                     |
| Arman V                                      | 6                      |
| <b>Eukarya:</b>                              |                        |
| <i>Acidomyces richmondensis</i>              | 28                     |
